# Supplementary material for: A conserved strategy for inducing appendage regeneration in moon jellyfish, Drosophila, and mice
Source: eLife. 2021 Dec 7;10:e65092. doi: 10.7554/eLife.65092 (PMC8782573; doi:10.7554/eLife.65092)
Supplement: Figure 2—source data 1. [file elife-65092-fig2-data1.xlsx]

## Sheet: Screen design
The experimental design was as described in Methods for the main experiments. Essentially,
the screen methodology was as follow:
A. The choice of the factors screened was dictated by a combination of considerations:
	- Evidence in literature for involvement in regeneration in other systems, e.g., various
	developmental pathways
	- Natural factors that have been shown, or are intuitively would be, relevant to Aurelia’s
	life history, e.g., nutrient level, oxygen level.
	- Limitations such as availability for drugs or feasible implementation for physical factors.
The specific rationale for each factor tested is detailed in the tab ‘Screen details’.
B. Experimental design and regeneration assessment. Experiments were performed at 20°C,
except for those testing the effects of different temperatures. Two-to-three-day-old ephyrae were
anesthetized in 400 μM menthol and amputated using a razor blade. In all experiments, the
amputation removed three arms, as illustrated in Figure 1c. Except for experiments testing aquaria
setups, amputated ephyrae were let to recover in 1 L sand settling cones (Nalgene Imhoff, Figure
3—figure supplement 1). In each experiment, control and treated groups were set up side by side.
Control and treated ephyrae were fed daily. Each experiment was repeated across 2-5 strobilation
batches (biological replicates). Regeneration was assessed at 1-2 weeks after amputation.
C. Modulators or changes in physical parameters were implemented upon amputation. Small
molecules were refreshed weekly. The drug targets, the concentrations tested, and the number of
ephyra tested are detailed in the tab 'Screen details’. Some factors were dissolved in
DMSO or ethanol; for these molecules, the control group was administered with an equal volume
of the solvent.
D. To determine the range of parameters tested, since few, if at all, of the molecular modulators
had been tested in Aurelia, the maximum concentrations were tested to maximize the chance of
seeing an effect. Maximum concentration was determined by solubility in saltwater or onset of
adverse effects (e.g., degrowth, paralysis, death) upon overnight incubation. Where available,
previously reported concentrations in cell culture or animal systems were included in the testing.
A negative result means no obvious effects were observed at the maximum concentration that
warrant further investigation. For factors that gave interesting effects (e.g., insulin), a range of
lower concentrations were subsequently tested for optimization.

## Sheet: Factors tested
Factor	Highest dose tested	Source		Physical factor	What was tested	Implementation
Modulators of signaling pathways				Nutrient	1-50 rotifers/animal	Food was administered daily
Erbstatin	5 mM	Sigma D2667			0-5 brine shrimps/animal
hEGF recombinant	20 ng/mL	Sigma E9644			Combination of both
UO126	1 mM	Millipore 6625
Dorsomorphin	1 mM	Sigma P5499		Water current	0-60 bubbles/minute	Ambient air was pumped to the cone
LiCl	250 mM	Sigma L4408
CHIR99021	12.5 mM	Sigma SML1046		Aquarium geometry	Beaker, plate, tube, cone	Amputated ephyrae were placed in different aquaria
IWR-1	10 mM	Sigma I0161
XAV939	2 mM	Sigma X3004		Water volume	100 mL - 1 L
Purmorphamine	2 mM	Sigma SML0868
hTGF-b1	1.2 ng/mL	Peprotech 100-21		Animal density	10-100 ephyrae/L
Modulators of metabolism, immune system, stress response				Temperature	18-25oC	Cooler or heater
Diosmetin	10 mM	Sigma D7321
17-DMAG	1 mM	TSZ Chemicals R1028		Heat shock	30 seconds at 42oC	Water bath
Geranylgeranylacetone	1 mM	Sigma G5408			30 minutes at 37oC
KNK437	4 nM	Sigma SML0964
MKT-077	2.5 mM	Sigma M5449		Dark	Ephyrae were kept in the dark throughout the experiment	Aquaria were wrapped with aluminum foil
Bromopyruvic acid	125 nM	Sigma 16490
6-Phosphogluconic acid	20 mM	Sigma P7877
Antamycin A	650 nM	Sigma A8674		Salinity	18-55 ppt	Ephyrae were placed in artificial seawater with varying salinity
3PO	10 mM	Millipore 525330
ATP	5 mM	Sigma A3377
3BDO	3 mM	Sigma SML1687		Means of current generation	Shaking	Incubator, 60-120 rpm
D-Fructose 1.6-bosphosphate	20 mM	Sigma F6803			Rotating	Rottiserrie, 5-8 rpm
DMOG	50 mM	Millipore 400091			Bubbling	Air tubing, 0-60 bubbles/minute
Rapamycin	1 mM	Sigma R8781
L-leucine methyl esther hydrochloride (cell permeable form)	100 mM	Sigma L1002
Resveratrol	5 mM	Sigma R5010
Sapanisertib	2 nM	Selleck Chemicals S2811
MHY1485	2 mM	Sigmal SML0810
Insulin, human	3 mM	Sigma I0908
AICAR	25 mM	Santa Cruz sc-200659A
A769662	5 mM	Santa Cruz sc-203790
D-Erythrose 4-phosphate	20 mM	Sigma E0377
CoCl	450 nM	Sigma 60818
Miscellaneous
BSA	500 nM	Sigma A7906
Ethanol	20 mL/L	VWR 89125-170
CsCl	5 mL/L	Sigma C4036

## Sheet: Screen details
Factor	Rationale for testing the factor	Target molecule / mechanism of action		Number of ephyrae tested (total comes from 2 to >5 biological replicates)	Doses tested	Rationale for the doses tested: doses tested reflect the typical ranges found in literature (specified below), and/or limited by solubility in seawater or onset of signs of lethality.
Signaling pathways. We tested several signaling pathways that have been implicated in regeneration and for which modulators are commercially available.
Chir99021	Modulators of the canonical Wnt pathway, which has been repeatedly implicated in organismal-level regeneration, e.g., in: hydra, doi: 10.1016/j.ydbio.2009.02.004 planaria, doi: 10.1073/pnas.0906823106 mouse digit tip, doi: 10.1038/nature12214	Activates the canonical Wnt pathway by inhibiting GSK3b		180	5, 6.25, 10, 12.5 mM	Doses used in various systems, e.g., frog, amphioxus, mouse, cultured cells	Review on Wnt modulators, doi: 10.1002/pro.3122 Frog embryo and cell culture, doi: 10.15252/embr.201744807 Amphioxus embryo, doi: 10.1038/322371a0 Mouse embryo, doi: 10.1038/s41467-018-03512-5
LiCl				120	2, 10, 150, 250 mM	Range used in frog embryos	doi: 10.1038/322371a0
Wnt3a		Activates the canonical Wnt pathway by activating the Frizzled receptor		~500	10, 20, 50, 100, 500 ng/mL	Range used in cell culture	doi: 10.1126/science.1228734
XAV939		Inhibits the canonical Wnt pathway by inhibiting TNKS and stabilizing Axin		40	2 mM	Range used in cell culture	doi: 10.1038/nature08356
IWR-1				40	10 mM	Range used in cell culture	doi: 10.1038/nchembio.137
EGF	Modulators of the EGF/RTK pathway, which has been implicated in wound healing and regeneration, e.g., in: planaria, doi: 10.1242/dev.131995 wound healing, doi: 10.1089/wound.2011.0326	Activates the RTK pathway as a ligand to EGFR		119	0.6, 6, 20 ng/mL	Range used in cell culture	doi: 10.7554/eLife.31993 doi: 10.1634/stemcells.2007-0299
Erbstatin		Inhibits the RTK pathway by inhibiting the phosphorylation of EGFR		100	1, 5, 10 mM	Range used in cell culture	doi: 10.1046/j.1365-2184.1998.00108.x
UO126		Inhibits the RTK pathway as a highly selective inhibitor of MEK1 and MEK2		200	400 nM, 800 nM, 1 mM	Range used in cell culture	doi: 10.1074/jbc.273.29.18623
LiCl and EGF	Testing if combined modulation of the Wnt and EGF pathway would produce stronger effects	Activates the RTK and canonical Wnt pathways by inhibiting GSK3b, (lithium) and activating EGFR (EGF)		50	250 mM (lithium), 20 ng/mL (EGF)	Doses used in frog embryo (lithium) and cell culture (Egf)	LiCl, doi: 10.1038/322371a0 EGF, doi: 10.7554/eLife.31993; doi: 10.1634/stemcells.2007-0299
Dorsomorphin	Modulators of the Bmp pathway, which is shown to induce tissue regrowth in mouse digit: doi: 10.1242/dev.042424 doi: 10.1038/s41467-018-08278-4	Inhibits the Bmp pathway by inhibiting type-I Bmp receptor; also inhibits AMPK		60	1, 5, 10 mM	Range used in mouse and zebrafish embryo experiments	doi: 10.1016/j.ydbio.2020.11.005 doi: 10.1038/nchembio.2007.54
Apigenin		Inhibits the Bmp pathway; also shows broad effects on molecular signals, including MAPK, NFkB, p53		20	1, 10 mM	Range used in cell culture and zebrafish embryo	doi:10.1371/journal.pone.0059045
Diosmetin		Inhibits the Bmp pathway; also acts as antioxidant, inhibits Tgfb pathway, inhibits NF-kB pathway		40	1, 10 mM	Range used in cell culture	doi:10.1371/journal.pone.0059045 doi: 10.1155/2020/5725361 doi: 10.3390/molecules25010192 doi: 10.18632/oncotarget.15413
Tgfb1	Modulators of the Tgfb pathway, which is implicated in Xenopus tail regeneration, doi: 10.1016/j.ydbio.2007.12.031	Activates the Tgfb pathway as a ligand to Tgfb receptor		40	1.2 ng/mL	Range used in cell culture	doi: 10.1073/pnas.1611428114
SB431542		Inhibitor of the Tgfb pathway		20	5, 10 mM	Range used in cell culture	https://mct.aacrjournals.org/content/3/6/737
Purmorphamine	Modulator of the Hedgehog pathway, which is shown to be active in the regenerating newt blastema, doi.org/10.1073/pnas.94.17.9159	Activates the Hedgehog pathway by binding to and activating Smoothened		40	2 mM	Range used in cell culture	doi: 10.1038/nchembio753
Stress, inflammatory, metabolic pathways. We tested stress response, inflammation, and metabolic modulation because of their emerging roles in tissue regeneration
17-DMAG	Modulators of various heat shock proteins, which are increasingly implicated in regeneration, e.g., fin regeneration in zebrafish, doi: 10.1073/pnas.0507408102 liver regeneration, doi: 10.1002/lt.23813 optic nerve regeneration, doi: 10.1016/j.neuint.2011.02.017	Inhibits Hsp90		60	1 mM	Range used in cell culture	doi: 10.1038/bcj.2013.30 doi: 10.1016/j.biopha.2018.03.102
Geranylgeranylacetone (GGA)		Induces Hsp70, Hsp27, Hsp22; antiulcer agent		60	1, 50 mM	Range used in cell culture	doi: 10.1053/gast.1996.v111.pm8690199
KNK437		Pan-Hsp inhibitor		60	1 mM	Highest dose before onsets of lethality
MKT077		Inhibits mtHsp70		100	2 mM	Range used in cell culture	doi: 10.1021/ml400204n
DMOG	Activators of HIF1a, a downstream effector of hypoxia. Hypoxia has been shown to enhance heart regeneration (doi: 10.1016/j.neuron.2015.09.050), axon regeneration (doi: 10.1016/j.neuron.2015.09.050) in mice.	Activates HIF11a by Inhibiting HIF-PH		80	25, 50, 75 mM	Range used in cell culture	doi: 10.1038/s41598-020-58482-w
CoCl2		Induces HIF1a		60	1 mM	Highest dose before onsets of lethality
Antimycin A	Various modulators of metabolic pathways. Metabolic modulation has been increasingly implicated in tissue repair and regeneration, e.g., in mouse digit, doi:10.1016/j.cell.2013.09.059 in zebrafish tail regeneration, doi:10.1101/2020.03.03.975318 in heart regeneration, doi:10.1101/2020.03.03.975318	Inhibits oxidative phosphorylation (mitochondrial electron transport chain complex III)		111	500, 650 nM	Highest dose before onsets of lethality
3-Bromopyruvic acid (3BP)		Inhibits energy metabolism, especially glycolysis (hexokinase II, GAPDH, pyruvate dehydrogenase, succcinate dehydrogenase)		110	100, 125 nM	Highest dose before onsets of lethality
6-Phosphogluconic acid (6PG)		Inhibits glycolysis (targets phosphoglucose isomerase); a metabolite in pentose phosphate pathway		30	20 mM	Highest dose before onsets of lethality
3PO		Inhibits glycolysis (inhibits PFKFB3)		126	5, 7.5, 10 mM	Range used in cell culture	doi: 10.1158/1535-7163.MCT-07-0482 doi: 10.1002/1873-3468.13878
Fructose-1,6-bisphophate (FBP)		Activates glycolysis (a metabolite in glycolysis and allosteric activator of pyruvate kinase)		80	20 mM	Highest dose before onsets of lethality
ATP		Energy		60	5 mM	Range of cellular concentration of ATP	doi: 10.1016/B978-0-323-07307-3.10074-6
Insulin		Glucose metabolism, growth, and other processes		~500	10 nM, 100 nM, 500 nM, 3 mM	Highest dose soluble
L-Leucine methyl esther hydrochloride (cell soluble form)		Amino acid metabolism, growth, and other processes		~300	100 mM	Highest dose before onsets of lethality
Miscellaneous.
Menthol	Menthol inhibits symmetrization (doi: 10.1073/pnas.1502497112). This experiment tested the hypothesis that inhibiting symmetrization may promote arm regeneration. It did not.	Inhibits symmetrization by inhibiting muscle contration.		30	400 mM	This dose blocks muscle contraction	doi: 10.1073/pnas.1502497112
CsCl	Cesium chloride is an inducer of larval metamorphosis in various marine organisms, and was recently shown to induce reverse development in hydrozoan (doi: 10.1387/ijdb.062152js).	Mechanism is unknown.		18	1, 5 mM	Range used in various marine organisms	doi: 10.1387/ijdb.062152js
BSA	Non-specific protein control. Regular and BSA-treated seawater were used as controls for insulin and growth factors (Wnt, EGF, Tgfb).			~400	500 nM	Same dose as insulin
DMSO	Solvent control.			~500	Various	Same molar concentrations as those used for the relevant molecules
EtOH	Solvent control.			~400	Various	Same molar concentrations as those used for the relevant molecules
Physical factors. We tested various physical and environmental factors that could be relevant to Aurelia's life history.
Factor	Rationale for testing the factor	Implementation		# ephyrae tested	Note on findings
Aquarium geometry	These factors were tested to find the optimal aquarium setup that promotes regenerative response. In all our previous studies, the behavior (sleep, doi: 10.1016/j.cub.2017.08.014) or phenomenon (symmetrization, doi: 10.1073/pnas.1502497112) we studied robustly occured across various aquarium setups (e.g., plate, beaker, cone). However, when we began testing for regenerative response, we began obs…	Ephyrae were let to recover in various aquaria: beaker, 6-well plate, falcon tube, cone.		~1000	Regeneration was observed most consistently when the animals were reared in an aquarium where they are exposed to continual current. Ephyrae in stagnant water did not regenerate as well. In the beaker with bubbling, even though there is current, the geometry makes it so that animals can escape the current and remain in the bottom. In the cone with bubbling, the conic geometry causes the ephyrae t…
Water current (including stagnant vs current)		Plate (stagnant) Beaker without bubbling (stagnant) vs with bubbling (current) Cone: 0-120 bubbles per minute		~240
Means of current generation		Shaking (in shaking incubator, 60-120rpm) Rotating (with rottiserrie, 5-8 rpm) Bubbling (with air tube, performed in different aquarium geometries)		~300	Similar to what is described above, too turbulent of a current caused adverse effects on the animals.
Water volume		We tested various water volumes in the various aquaria: cone: 500 mL, 1L beaker: 250, 500, 1000, 2000 mL		~500	No strong effects were observed.
Animal density		cone: 30 and 60 ephyrae in 500 mL cone: 30 and 60 ephyrae in 1L beaker: 30 and 60 ephyrae in 500mL		~1000	No strong effects were observed. In the experiments, we maintained a moderate density (30 ephyrae/500mL) to maximise the number of ephyrae while minimizing water quality problem.
Nutrient level	Aurelia is found in a wide range of environmental conditions, in both rich- and low-nutrient waters (doi:10.1023/A:1011836326717)	Animals were fed daily a specified amount of food: 0-50 rotifers/animal 0-5 brine shrimps/animal combination of both		~1000	Simply a wide range was tested. See main text for results.
Oxygen level	Hypoxia has been shown to enhance in mice heart regeneration (doi: 10.1016/j.neuron.2015.09.050) and axon regeneration (doi: 10.1016/j.neuron.2015.09.050). Hypoxic seawater is thought to correlate with occurrence of jellyfish bloom, doi: 10.1038/s41598-017-01318-x	Nitrogen or argon was bubbled into the aquaria, as opposed to regular air in control, to achieve ~50% reduction in oxygen level. We did not test more range because our current set up did not allow such precision; however 50% reduction in oxygen level produced dramatic effect, so we stayed with this parameter.		~650	See main text for results.
Temperature	Aurelia is found in a wide range of environmental conditions, from the Arctic ocean to the tropical waters (doi:10.1023/A:1011836326717)	Ephyrae were placed at room temperature (23oC) or temperature-controlled room (18oC)		~250	Ephyrae from our lab strain did not grow as well at room temperature. All remaining experiments were consequently performed at 18oC.
Heat shock		Ephyrae were placed in a water bath: 30 seconds at 42oC 30 minutes at 37oC		190	The parameters were chosen based on typical heat shock experiments we know. Fruit flies, normally growing at 25oC, are typically heat shocked at 37oC. Human cells, normally growing at 37oC, are typically heat shocked at 42oC.
Dark	In a previous study, we showed that jellyfish are responsive to light-dark cycle and exhibit sleep-like behavior (doi: 10.1016/j.cub.2017.08.014). This made us wonder if sleep cycle might affect regenerative response.	Ephyrae were kept in the dark at all times by covering the aquaria with aluminum foil.		59	No strong effects were observed.
Salinity	Aurelia is found in a wide range of environmental conditions, from open ocean to brackish estuaries (doi:10.1023/A:1011836326717)	18 - 55 ppt		~120	Regeneration occurred fine between ~28-36 ppt, and no strong differences were observed to indicate this was a strong parameter. Aurelia could survive lower or higher salinity, but they were not as healthy.
