# Supplementary material for: A conserved strategy for inducing appendage regeneration in moon jellyfish, Drosophila, and mice
Source: eLife. 2021 Dec 7;10:e65092. doi: 10.7554/eLife.65092 (PMC8782573; doi:10.7554/eLife.65092)
Supplement: Figure 3—source data 1. [file elife-65092-fig3-data1.xlsx]

## Sheet: High food
These data correspond to plots in Figure 3, Figure 3--fig sup 3,5-6.
If an ephyra regenerates multiple arms, all arms were measured and included in the table																creg: # control ephyra that regenerate; treg: # treated ephyra that regenerate
Only regenerates with length > 15% of uncut arm length were included in analysis																cnoreg: # control ephyrae that do not regenerate; tnoreg: # treated ephyrae that do not regenerate
Raw ephyra images analyzed are available in CaltechDATA, https://doi.org/10.22002/D1.2076																CI is 95% confidence intervals
																							Tables for computing effect size statistics
Arm length measurements																Number of ephyrae that regenerate arm(s)							Use these tables with R-codes to compute effect size metrics RR and OR
				Exp1-HF			Exp2-HF			Exp3-HF			Exp4-HF										Number of ephyrae that regenerate arm(s)								METAFOR
Exp	control	# arm		treated	# arm		treated	# arm		treated	# arm		treated	# arm		ExpID	# arm	creg	treg	N control	N treated		ExpID	creg	cnoreg	treg	tnoreg					RR	OR
Exp1-LF	0.165328	1		0.620454	1		0.238272	1		0.157349	1		0.781734	1		Exp1	0	76	42	78	74		Exp1	2	76	32	42				mean	7.52	30.91
Exp1-LF	0.422154	1		0.20821	1		0.182813	1		0.172221	1		0.385658	1			1	2	17				Exp2	1	81	13	73				lowCI	4.67	15.78
				0.3043	1		0.157288	1		0.167898	1		0.555274	1			2	0	14				Exp3	0	49	21	61				highCI	12.1	60.56
Exp2-LF	0.24047	1		0.313589	1		0.150135	1		0.353104	1		0.502358	1			3	0	1				Exp4	12	75	74	13				p-value	<0.0001	<0.0001
				0.64105	1		0.395291	1		0.191336	1		0.81251	1		Exp2	0	81	73	82	86											***	***
Exp4-LF	0.585161	1		0.327495	1		0.27097	1		0.238367	1		0.55347	1			1	1	7
Exp4-LF	0.182141	1		0.269818	1		0.342723	1		0.229082	1		0.533558	1			2	0	5				Number of ephyra that regenerate multiple arms
Exp4-LF	0.463574	1		0.220443	1					0.287958	1		0.327254	1			3	0	1				ExpID	creg	cnoreg	treg	tnoreg					RR	OR
Exp4-LF	0.357039	1		0.65248	1		0.255713	2		0.21521	1		0.197	1		Exp3	0	49	61	49	82		Exp1	0	78	15	59				mean	11.37	17.9
Exp4-LF	0.155796	1		0.359214	1		0.429035	2		0.151585	1		0.346637	1			1	0	13				Exp2	0	82	6	80				lowCI	4.89	7.21
Exp4-LF	0.598959	1		0.213894	1		0.275953	2		0.16215	1		0.228807	1			2	0	8				Exp3	0	49	8	74				highCI	26.41	44.45
Exp4-LF	0.237461	1		0.389255	1		0.315305	2		0.184492	1		0.463845	1			3	0	0				Exp4	4	83	40	47				p-value	<0.0001	<0.0001
Exp4-LF	0.348215	1		0.22643	1		0.267518	2		0.164255	1		0.212121	1		Exp4	0	75	13	87	87											***	***
Exp4-LF	0.538622	2		0.426596	1		0.225798	2					0.256819	1			1	8	34
Exp4-LF	0.196623	2		0.435213	1		0.178311	2		0.276324	2		0.543937	1			2	4	38				Number of ephyrae that regenerate rhopalium(a)
Exp4-LF	0.154578	2		0.168231	1		0.205959	2		0.265934	2		0.45722	1			3	0	2				ExpID	creg	cnoreg	treg	tnoreg					RR	OR
Exp4-LF	0.485176	2		0.150866	1		0.171138	2		0.476776	2		0.428146	1									Exp1	1	77	15	59				mean	11.84	19.64
Exp4-LF	0.152008	2					0.264391	2		0.239006	2		0.297855	1									Exp2	0	82	4	82				lowCI	5.29	8.23
Exp4-LF	0.498066	2		0.163779	2					0.204615	2		0.226688	1									Exp3	0	49	9	73				highCI	26.49	46.91
Exp4-LF	0.208549	2		0.532345	2					0.445332	2		0.245798	1									Exp4	4	83	46	41				p-value	<0.0001	<0.0001
Exp4-LF	0.322771	2		0.188762	2		0.192092	3		0.346868	2		0.261432	1																		***	***
				0.155763	2		0.162186	3		0.225539	2		0.512196	1
				0.461259	2		0.191138	3		0.289269	2		0.637152	1									Regenerate arm length
				0.686886	2					0.280858	2		0.737822	1									ExpID	m1i	m2i	sd1i	sd2i	n1i	n2i			R
				0.793916	2					0.355992	2		0.630343	1									Exp1	0.293741	0.364871	0.181603	0.20243	2	47		mean	1.56
				0.222191	2					0.209968	2		0.208815	1									Exp4	0.342796	0.543377	0.164398	0.225084	16	116		lowCI	1.23
				0.236262	2					0.227121	2		0.793112	1									can't use experiments 78 and 79, because control has 0-1 regenerate.								highCI	1.97
				0.627294	2					0.444604	2		0.686701	1																	p-value	0.0003
				0.594873	2					0.295712	2		0.295133	1									m1i: mean measurement, control; m2i: mean measurement, treated									***
				0.211128	2					0.165819	2		0.290615	1									sd1i: standard deviation, control; sd2i: standard deviation, treated
				0.773879	2								0.253583	1									n1i: sample size, control; n2i: sample size, treated
				0.242933	2								0.204593	1
				0.35756	2								0.380387	1
				0.200813	2								0.741681	1
				0.435335	2
				0.177466	2								0.956596	2
				0.201852	2								0.523279	2
				0.319501	2								0.529292	2
				0.596387	2								0.25617	2
				0.222575	2								0.520618	2
				0.150806	2								0.411587	2
				0.165323	2								0.45084	2
				0.224838	2								0.467674	2
				0.196489	2								0.690623	2
				0.222457	2								0.5375	2
													0.889344	2
				0.513777	3								1.0847	2
				0.424317	3								0.175911	2
				0.920612	3								0.578779	2
													0.836725	2
													0.752148	2
													0.852066	2
													0.643787	2
													0.530191	2
													0.721816	2
													0.587442	2
													0.626565	2
													0.590456	2
													0.537962	2
													0.7683	2
													0.754685	2
													0.527586	2
													0.725819	2
													0.752038	2
													0.569155	2
													0.628374	2
													0.665213	2
													0.297211	2
													0.428506	2
													0.852457	2
													0.814498	2
													0.836815	2
													0.940429	2
													0.893207	2
													0.317902	2
													0.565071	2
													0.240747	2
													0.297182	2
													0.456397	2
													0.233888	2
													0.299084	2
													0.619631	2
													0.276541	2
													0.255405	2
													0.964507	2
													0.188338	3
													0.355241	2
													0.717887	2
													0.819451	2
													0.837906	2
													0.867143	2
													0.620908	2
													0.180431	2
													0.748818	2
													0.524551	2
													0.458311	2
													0.703122	2
													0.790311	2
													0.230813	2
													0.395538	2
													0.327195	2
													0.852201	2
													0.713446	2
													0.655396	2
													0.38492	2
													0.845125	2
													0.360422	2
													0.428506	2
													0.755716	2
													0.668449	2
													0.51897	2
													0.680737	2
													0.885496	3
													0.412066	3
													0.24344	3
													0.691399	3
													0.446562	3

## Sheet: Insulin
These data correspond to plots in Figure 3, Figure 3--fig sup 3, 5-6.
If an ephyra regenerates multiple arms, all arms were measured and included in the table																									creg: # control ephyra that regenerate; treg: # treated ephyra that regenerate
Only regenerates with length > 15% of uncut arm length are included in data analysis																									cnoreg: # control ephyrae that do not regenerate; tnoreg: # treated ephyrae that do not regenerate
Raw ephyra images analyzed are available in CaltechDATA, https://doi.org/10.22002/D1.2076																									CI is 95% confidence intervals
																																Tables for computing effect size statistics
Arm length measurements																									Number of ephyrae that regenerate arm(s)							Use these tables with R-codes to compute effect size metrics RR and OR
				Exp7-HFInsulin			Exp6-HFInsulin			Exp5-HFInsulin			Exp3-HFInsulin			Exp4-HFInsulin			Exp1-HFInsulin			Exp2-HFInsulin										Number of ephyrae that regenerate arm(s)								METAFOR
ExpID	control	# arm		treated	# arm		treated	# arm		treated	# arm		treated	# arm		treated	# arm		treated	# arm		treated	# arm		ExpID	# arm	creg	treg	N control	N treated		ExpID	creg	cnoreg	treg	tnoreg				insulin	RR	OR
Exp7-HF	0.42495	1		0.460418	1		0.417364	1		0.153296	1		0.289423	1		0.447811	1		0.22812	1		0.175778	1		Exp1	0	78	78	85	85		Exp1	7	78	7	78				mean	2.38	5.02
Exp7-HF	0.639459	1		0.779541	1		0.150918	1		0.467701	1		0.401069	1		0.304643	1		0.16486	1		0.367503	1			1	5	5				Exp2	1	87	55	25				lowCI	1.14	1.3
Exp7-HF	0.162301	2		0.158271	1		0.228911	1		0.21988	1		0.326503	1		0.416366	1		0.160535	1		0.505777	1			2	2	2				Exp3	13	73	24	58				highCI	4.95	19.36
Exp7-HF	0.209012	2		0.418096	1		0.17479	1		0.154734	1		0.184153	1		0.402387	1		0.180616	1		0.15114	1			3	0	0				Exp4	21	61	70	7				p-value	0.023	0.0192
Exp7-HF	0.601932	2		0.655924	1		0.250382	1		0.207751	1		0.270348	1		0.853245	1		0.175467	1		0.233869	1		Exp2	0	87	25	88	80		Exp5	22	47	21	61					*	*
Exp7-HF	0.428506	2		0.475548	1		0.240405	1		0.284176	1		0.249236	1		0.320739	1					0.169826	1			1	1	28				Exp6	35	68	54	37
				0.182319	1		0.237418	1		0.648485	1		0.226635	1		0.52724	1					0.227621	1			2	0	27				Exp7	4	22	21	17
							0.716122	1		0.316071	1		0.649929	1		0.450823	1					0.394721	1			3	0	0
Exp6-HF	0.357532	1					0.152778	1		0.626602	1		0.220289	1		0.473701	1					0.158007	1		Exp3	0	73	58	86	82
Exp6-HF	0.193213	1					0.513894	1		0.296033	1		0.301486	1		0.20287	1					0.183525	1			1	7	17				Number of ephyra that regenerate multiple arms
Exp6-HF	0.162523	1					0.16802	1					0.80797	1		0.225326	1					0.35561	1			2	5	6				ExpID	creg	cnoreg	treg	tnoreg					RR	OR
Exp6-HF	0.65532	1					0.189563	1					0.587891	1		0.332635	1					0.198431	1			3	1	1				Exp1	2	83	2	83				mean	1.92	2.2
Exp6-HF	0.220078	1					0.390666	1					0.392232	1		0.332227	1					0.256311	1		Exp4	0	61	7	82	77		Exp2	0	88	27	53				lowCI	1.33	1.44
Exp6-HF	0.283515	1					0.26811	1					0.482344	1		0.790603	1					0.168171	1			1	13	43				Exp3	6	80	7	75				highCI	2.77	3.36
Exp6-HF	0.173962	1					0.185424	1					0.301707	1		0.219922	1					0.483804	1			2	8	27				Exp4	8	74	27	50				p-value	0.0005	0.0002
Exp6-HF	0.225314	1					0.457772	1					0.466922	1		0.454761	1					0.312817	1			3	0	0				Exp5	9	60	11	71					***	***
Exp6-HF	0.505195	1					0.467046	1					0.174419	1		0.200233	1					0.274106	1		Exp5	0	47	61	69	82		Exp6	13	90	17	74
Exp6-HF	0.355162	1					0.248205	1								0.402642	1					0.156438	1			1	13	10				Exp7	2	24	14	24
Exp6-HF	0.175306	1					0.179153	1								0.271179	1					0.152517	1			2	7	9
Exp6-HF	0.267567	1					0.351369	1								0.409434	1					0.156545	1			3	2	2
Exp6-HF	0.208779	1					0.509719	1								0.447373	1					0.352022	1		Exp6	0	68	37	103	91		Number of ephyrae that regenerate rhopalium(a)
Exp6-HF	0.21847	1					0.556858	1								0.239082	1					0.19133	1			1	22	37				ExpID	creg	cnoreg	treg	tnoreg					RR	OR
Exp6-HF	0.155942	1					0.19099	1								0.361243	1					0.157752	1			2	12	15				Exp1	6	79	1	84				mean	1.34	1.46
Exp6-HF	0.245107	1					0.287523	1								0.496048	1					0.161945	1			3	1	2				Exp2	0	88	18	62				lowCI	0.65	0.57
Exp6-HF	0.497606	1					0.258652	1								0.303833	1					0.309146	1		Exp7	0	22	17	26	38		Exp3	4	82	3	79				highCI	2.73	3.71
Exp6-HF	0.318066	1					0.293732	1								0.616365	1					0.189816	1			1	2	7				Exp4	9	73	17	60				p-value	0.4272	0.4314
Exp6-HF	0.249609	1					0.553734	1								0.460976	1					0.21366	1			2	2	12				Exp5	11	58	10	72					n.s	n.s
Exp6-HF	0.48043	1					0.26587	1								0.367855	1					0.196918	1			3	0	2				Exp6	21	82	29	62
Exp6-HF	0.259568	1					0.300497	1								0.503146	1															Exp7	3	23	20	18
Exp6-HF	0.158618	1					0.193403	1								0.284581	1
Exp6-HF	0.347815	2					0.503718	1								0.283316	1
Exp6-HF	0.154856	2					0.19436	1								0.170606	1															Regenerate arm length
Exp6-HF	0.170457	2					0.260171	1								0.495082	1															Exp ID	m1i	m2i	sd1i	sd2i	n1i	n2i			R
Exp6-HF	0.298553	2					0.372186	1								0.174166	1															Exp7	0.411027	0.461509	0.195857	0.204522	6	37		mean	1.2
Exp6-HF	0.181526	2					0.555986	1								0.393819	1															Exp6	0.294928	0.318231	0.128414	0.139917	49	73		lowCI	0.98
Exp6-HF	0.268325	2					0.214362	1								0.215565	1															Exp5	0.430887	0.400798	0.235476	0.182167	33	34		highCI	1.48
Exp6-HF	0.232657	2					0.211857	1								0.305148	1															Exp3	0.243601	0.417921	0.0789736	0.224104	20	32		p-value	0.0797
Exp6-HF	0.536679	2														0.454395	1															Exp4	0.256026	0.37092	0.0910762	0.157527	29	97			n.s
Exp6-HF	0.351222	2														0.461861	1															Exp1	0.314586	0.285375	0.120507	0.205956	9	9
Exp6-HF	0.212267	2														0.173837	1															can't use exp Exp2 because control only has one arm
Exp6-HF	0.211339	2														0.334443	1
Exp6-HF	0.181542	2														0.2698	1															m1i: mean measurement, control; m2i: mean measurement, treated
Exp6-HF	0.19104	2														0.189283	1															sd1i: standard deviation, control; sd2i: standard deviation, treated
Exp6-HF	0.261495	2		0.203738	2		0.191199	2		0.530861	2		0.451414	2		0.523639	2		0.339234	2		0.188929	2									n1i: sample size, control; n2i: sample size, treated
Exp6-HF	0.176329	2		0.391175	2		0.253692	2		0.166503	2		0.16866	2		0.532997	2		0.193633	2		0.164323	2
Exp6-HF	0.648902	2		0.292095	2		0.292931	2		0.200843	2		0.243255	2		0.468565	2		0.805322	2		0.286403	2
Exp6-HF	0.157739	2		0.447055	2		0.167672	2		0.180873	2		0.622376	2		0.258163	2		0.320589	2		0.292516	2
Exp6-HF	0.338858	2		0.745397	2		0.342469	2		0.524306	2		0.22505	2		0.769338	2					0.394802	2
Exp6-HF	0.3962	2		0.70486	2		0.373829	2		0.457579	2		0.543571	2		0.545331	2					0.238811	2
Exp6-HF	0.464409	2		0.411225	2		0.182069	2		0.330479	2		0.441325	2		0.605966	2					0.451759	2
Exp6-HF	0.336512	2		0.218114	2		0.165422	2		0.278869	2		0.219973	2		0.534178	2					0.23888	2
Exp6-HF	0.217106	2		0.729205	2		0.179389	2		0.484628	2		0.880652	2		0.350624	2					0.550507	2
Exp6-HF	0.406643	2		0.434938	2		0.36805	2		0.480276	2		0.613305	2		0.235906	2					0.480122	2
Exp6-HF	0.362678	2		0.682982	2		0.367113	2		0.585987	2		0.313195	2		0.349196	2					0.453836	2
Exp6-HF	0.396672	3		0.75554	2		0.291324	2		0.45624	2		0.357641	2		0.279399	2					0.421722	2
Exp6-HF	0.388512	3		0.565269	2		0.39503	2		0.362305	2					0.22226	2					0.274673	2
Exp6-HF	0.194256	3		0.564825	2		0.19138	2		0.626998	2					0.69748	2					0.267784	2
				0.419522	2		0.160091	2		0.465852	2					0.602927	2					0.313794	2
Exp5-HF	0.160936	1		0.175349	2		0.241207	2		0.275051	2					0.5148	2					0.380902	2
Exp5-HF	0.471872	1		0.527308	2		0.396008	2		0.699027	2					0.63474	2					0.550578	2
Exp5-HF	0.633173	1		0.339315	2		0.498524	2		0.209414	2					0.596524	2					0.32593	2
Exp5-HF	0.155604	1		0.169458	2		0.775143	2								0.384563	2					0.362932	2
Exp5-HF	0.170821	1		0.239123	2		0.417954	2								0.538156	2					0.478244	2
Exp5-HF	0.154737	1		0.25587	2		0.285306	2								0.240168	2					0.571904	2
Exp5-HF	0.186041	1		0.656112	2		0.204281	2								0.466559	2					0.677209	2
Exp5-HF	0.290422	1		0.168718	2		0.355279	2								0.175554	2					0.380361	2
Exp5-HF	0.655371	1		0.199697	2		0.605194	2								0.186881	2					0.503275	2
Exp5-HF	0.278387	1					0.373868	2								0.210722	2					0.515249	2
Exp5-HF	0.287576	1					0.261502	2								0.236162	2					0.354979	2
Exp5-HF	0.358696	1					0.297556	2								0.195612	2					0.25462	2
Exp5-HF	0.246518	1					0.444714	2								0.185162	2					0.530742	2
Exp5-HF	0.729973	2					0.31224	2								0.366116	2					0.305409	2
Exp5-HF	0.610158	2					0.371603	2								0.159559	2					0.227306	2
Exp5-HF	1.00281	2														0.351291	2					0.154393	2
Exp5-HF	0.212681	2														0.391736	2					0.532004	2
Exp5-HF	0.48322	2														0.397087	2					0.329042	2
Exp5-HF	0.49166	2														0.340164	2					0.418203	2
Exp5-HF	0.56424	2														0.22675	2					0.456068	2
Exp5-HF	0.990035	2														0.486136	2					0.618381	2
Exp5-HF	0.403578	2														0.27693	2					0.290459	2
Exp5-HF	0.676488	2														0.271053	2					0.503315	2
Exp5-HF	0.152481	2														0.206185	2					0.25132	2
Exp5-HF	0.30383	2														0.249726	2					0.3566	2
Exp5-HF	0.426472	2														0.234843	2					0.553923	2
Exp5-HF	0.451392	2														0.262418	2					0.454639	2
Exp5-HF	0.54987	3														0.311363	2					0.40483	2
Exp5-HF	0.649045	3														0.220531	2					0.210188	2
Exp5-HF	0.68021	3														0.28872	2					0.476719	2
Exp5-HF	0.405032	3														0.229544	2					0.192216	2
Exp5-HF	0.188656	3														0.454953	2					0.428225	2
Exp5-HF	0.197275	3														0.18136	2					0.599299	2
																0.155685	2					0.396574	2
Exp3-HF	0.182813	1														0.378608	2					0.447311	2
Exp3-HF	0.238272	1														0.54548	2					0.182709	2
Exp3-HF	0.157288	1														0.302468	2					0.213503	2
Exp3-HF	0.150135	1														0.354617	2					0.386418	2
Exp3-HF	0.395291	1														0.753759	2					0.275333	2
Exp3-HF	0.27097	1		0.765252	3		0.41753	3		0.543026	3		0.90678	3
Exp3-HF	0.342723	1		0.627522	3		0.249605	3		0.512689	3		0.890792	3
Exp3-HF	0.178311	2		0.525232	3		0.212124	3		0.763511	3		0.162928	3
Exp3-HF	0.205959	2		0.683098	3		0.50973	3		0.677722	3
Exp3-HF	0.171138	2		0.597631	3		0.201489	3		0.238421	3
Exp3-HF	0.264391	2		0.450091	3		0.166403	3		0.200937	3
Exp3-HF	0.429035	2
Exp3-HF	0.275953	2
Exp3-HF	0.315305	2
Exp3-HF	0.255713	2
Exp3-HF	0.225798	2
Exp3-HF	0.267518	2
Exp3-HF	0.192092	3
Exp3-HF	0.191138	3
Exp3-HF	0.162186	3
Exp4-HF	0.164255	1
Exp4-HF	0.157349	1
Exp4-HF	0.172221	1
Exp4-HF	0.167898	1
Exp4-HF	0.353104	1
Exp4-HF	0.191336	1
Exp4-HF	0.238367	1
Exp4-HF	0.229082	1
Exp4-HF	0.287958	1
Exp4-HF	0.21521	1
Exp4-HF	0.151585	1
Exp4-HF	0.16215	1
Exp4-HF	0.184492	1
Exp4-HF	0.276324	2
Exp4-HF	0.225539	2
Exp4-HF	0.289269	2
Exp4-HF	0.280858	2
Exp4-HF	0.355992	2
Exp4-HF	0.209968	2
Exp4-HF	0.227121	2
Exp4-HF	0.444604	2
Exp4-HF	0.295712	2
Exp4-HF	0.165819	2
Exp4-HF	0.265934	2
Exp4-HF	0.476776	2
Exp4-HF	0.239006	2
Exp4-HF	0.346868	2
Exp4-HF	0.445332	2
Exp4-HF	0.204615	2
Exp1-LF	0.24047	1
Exp1-LF	0.490053	1
Exp1-LF	0.287743	1
Exp1-LF	0.483136	1
Exp1-LF	0.325443	1
Exp1-LF	0.185094	2
Exp1-LF	0.411462	2
Exp1-LF	0.20214	2
Exp1-LF	0.205732	2
Exp2-LF	0.233797	1

## Sheet: Hypoxia
These data correspond to plots in Figure 3, Figure 3--fig sup 3, 5-6.
If an ephyra regenerates multiple arms, all arms were measured and included in the table																																						creg: # control ephyra that regenerate; treg: # treated ephyra that regenerate
Only regenerates with length > 15% of uncut arm length are included in data analysis																																						cnoreg: # control ephyrae that do not regenerate; tnoreg: # treated ephyrae that do not regenerate
Raw ephyra images analyzed are available in CaltechDATA, https://doi.org/10.22002/D1.2076																																						CI is 95% confidence intervals
Arm length measurements																																						Number of ephyrae that regenerate arm(s)							Tables for computing effect size statistics
ExpID	Exp1						Exp2						Exp3						Exp4						Exp5						Exp6														Use these tables with R-codes to compute effect size metrics RR and OR
	control			treated			control			treated			control			treated			control			treated			control			treated			control			treated											Number of ephyrae that regenerate arm(s)
#arm	1	2	3	1	2	3	1	2	3	1	2	3	1	2	3	1	2	3	1	2	3	1	2	3	1	2	3	1	2	3	1	2	3	T	2	3		ExpID	# arm	creg	treg	N control	N treated		ExpID	creg	cnoreg	treg	tnoreg
				0.424006	0.625999		0.585161	0.208549		0.364661	0.473983		0.233797			0.305274	0.873101		0.241712	0.430897	0.735399	0.518085			0.157349	0.276324		0.442535			0.781734	0.956596	0.446562	0.435999	0.207938	0.423727		Exp1	0	49	33	49	67		Exp1	0	49	34	33
				0.489437	0.279219		0.463574	0.322771		0.165962	0.18843					0.584711	0.665689		0.208632	0.202505	0.194139	0.763725			0.172221	0.265934		0.316737			0.197	0.523279	0.885496	0.269308	0.65881	0.354831			1	0	27				Exp2	12	75	38	46
				0.287021	0.573676		0.357039	0.498066		0.197398	0.495108					0.540016	0.168567		0.217418	0.399164	0.640562	0.440107			0.167898	0.476776		0.86147			0.385658	0.529292	0.24344	0.215558	0.476198	0.37919			2	0	7				Exp3	1	87	42	35
				0.23267	0.404444		0.155796	0.538622		0.151586	0.522206					0.621211	0.794832		0.213026	0.54313		0.451577			0.353104	0.239006		0.910604			0.555274	0.25617	0.691399	0.458773	0.330038				3	0	0				Exp4	34	49	74	13
				0.332554	0.638648		0.598959	0.196623		0.243631	0.785574					0.200287	0.827013		0.255836	0.292272		0.546482			0.191336	0.204615		0.641128			0.502358	0.520618	0.188338	0.633179	0.623258			Exp2	0	87	35	88	77		Exp5	21	61	49	7
				0.433278	0.179611		0.237461	0.154578		0.246272	0.2686					0.241928	0.834476		0.253086	0.219066		0.496898			0.238367	0.445332		0.938023			0.81251	0.411587	0.412066	0.408175	0.43549				1	1	28				Exp6	74	13	65	16
				0.754483	0.157833		0.348215	0.485176		0.174257	0.566073					0.488373	0.713415		0.234976	0.394424		0.78238			0.229082	0.346868		0.425531			0.533558	0.45084		0.167116	0.426986				2	0	14
				0.253002	0.499708		0.182141	0.152008		0.322675	0.210251					0.564062	0.837746		0.407344	0.244307		0.531125			0.287958	0.225539		0.744722			0.327254	0.467674		0.524618	0.763866				3	0	0
				0.526886	0.160795					0.545046	0.788317					0.355623	0.499998		0.353501	0.318883		0.348755			0.21521	0.289269		0.216064			0.55347	0.690623		0.291881	0.312537			Exp3	0	61	7	82	56		Number of ephyra that regenerate multiple arms
				0.347761	0.555489					0.388902	0.887637					0.439138	0.612553		0.198117	0.693999		0.588729			0.151585	0.280858		0.633459			0.212121	0.5375		0.60256	0.269269				1	13	49				ExpID	creg	cnoreg	treg	tnoreg
				0.46239	0.412454					0.423886	0.429339					0.375805	0.663318		0.205207	0.302478		0.262719			0.16215	0.355992		0.547742			0.346637	0.889344		0.381416	0.669318				2	8	0				Exp1	0	49	7	60
				0.562109	0.598243					0.491553	0.787355					0.439508	0.218567		0.163496	0.657224		0.71927			0.184492	0.209968		0.558693			0.228807	1.0847		0.619613	0.331062				3	0	0				Exp2	4	83	15	69
				0.370719	0.214264					0.198009	0.496299					0.19986	0.173806		0.296412	0.294946		0.839381			0.164255	0.227121		0.643707			0.463845	0.175911		0.539837	0.305142			Exp4	0	75	46	87	84		Exp3	0	88	14	63
				0.306492	0.198729					0.315774	0.791972					0.617478	0.165006		0.195369	0.314629		0.803175				0.444604		0.72936			0.256819	0.578779		0.478444	0.761269				1	8	23				Exp4	8	74	0	56
				0.259668						0.164413	0.644937					0.534185	0.902751		0.17925	0.298721		0.254852				0.295712		0.656607			0.543937	0.836725		0.413956	0.356306				2	4	15				Exp5	14	69	0	87
				0.182113						0.200162	0.350151					0.730648	0.717301		0.267422	0.255228		0.43902				0.165819		0.608171			0.45722	0.752148		0.191393	0.684087				3	0	0				Exp6	40	47	28	53
				0.166567						0.485687	0.201052					0.449299	0.176359		0.214532	0.408569		0.318805						0.73383			0.428146	0.852066		0.366414	0.635009			Exp5	0	49	13	83	87
				0.183937						0.217384	0.191814					0.431334	0.803788		0.215298	0.238288		0.617988						0.765834			0.297855	0.643787		0.166774	0.506383				1	20	74
				0.254325						0.508113	0.191967					0.674516	0.502832		0.303492	0.236386		0.816647						0.472449			0.226688	0.530191		0.317919	0.154042				2	13	0				Number of ephyrae that regenerate rhopalium(a)
				0.159937						0.203935	0.36038					0.967907	0.715788		0.265318	0.352783		0.853925						0.507653			0.245798	0.721816		0.18901	0.313408				3	1	0				ExpID	creg	cnoreg	treg	tnoreg
				0.275255						0.207307	0.154287					0.716925	0.340791			0.192474		0.392337						0.796986			0.261432	0.587442		0.498846	0.617231			Exp6	0	13	16	87	81		Exp1	0	49	11	56
				0.171415						0.21785	0.319224					0.321368	0.604108			0.286444		0.24537						0.676044			0.512196	0.626565		0.189718	0.23441				1	34	37				Exp2	0	87	24	60
				0.259903						0.544259	0.251918					0.628964	0.211143			0.182253		0.730648						0.557517			0.637152	0.590456		0.412426	0.395019				2	38	27				Exp3	9	79	6	71
				0.560112							0.587876					0.866973	0.41799			0.304572		0.72101						0.905271			0.737822	0.537962		0.283206	0.562756				3	2	1				Exp4	4	79	15	72
				0.280838							0.49457					0.771289	0.522588			0.723804		0.64285						0.677274			0.630343	0.7683		0.380302	0.709739										Exp5	8	74	16	40
				0.196496							0.323307					0.517766	0.201857			0.152197		0.576445						0.447674			0.208815	0.754685		0.165705	0.437608										Exp6	46	41	45	36
				0.642237							0.278576					0.385741	0.203053					0.353005						0.22935			0.793112	0.527586		0.261372	0.437272
											0.236703					0.426979	0.19308					0.733625						0.901972			0.686701	0.725819		0.391904	0.17561
											0.370123											0.56768						0.444959			0.295133	0.752038		0.702226	0.548058										Regenerate arm length
											0.583921											0.639351						0.687901			0.290615	0.569155		0.527528	0.441684										Exp ID	m1i	m2i	sd1i	sd2i
																						0.546928						0.688146			0.253583	0.628374		0.403199	0.342679										Exp2	0.342796	0.381333	0.164398	0.196712
																						0.48327						0.641128			0.204593	0.665213		0.17205	0.605698										Exp4	0.314269	0.513102	0.150358	0.170005
																						0.606827						0.608566			0.380387	0.297211		0.670547	0.336358										Exp5	0.256026	0.561747	0.0910762	0.194723
																						0.365443						0.675881			0.741681	0.428506		0.21729	0.454944										Exp6	0.543377	0.415939	0.225084	0.170675
																						0.634225						0.649469				0.852457		0.797883	0.589672										can't use exps Exp1 and Exp3 because control has 0-1 regenerate
																						0.241274						0.617921				0.814498		0.154903	0.277894
																						0.391558						0.673118				0.836815		0.417212	0.434184										m1i: mean measurement, control; m2i: mean measurement, treated
																						0.693015						0.655312				0.940429			0.63497										sd1i: standard deviation, control; sd2i: standard deviation, treated
																						0.552235						0.572069				0.893207			0.34258										n1i: sample size, control; n2i: sample size, treated
																						0.296602						0.405122				0.317902			0.305142
																						0.480778						0.412976				0.565071			0.371787
																						0.505654						0.848248				0.240747			0.240099
																						0.329853						0.403668				0.297182			0.589104
																						0.569911						0.240598				0.456397			0.533995
																						0.725576						0.29143				0.233888			0.658965
																						0.590212						0.233766				0.299084			0.299065
																						0.625538						0.28652				0.619631			0.319615
																						0.619475						0.860572				0.276541			0.401998
																						0.451426						0.733403				0.255405			0.221004
																						0.410542						0.349927				0.964507			0.173227
																						0.571599						0.500536				0.355241			0.451765
																						0.486553						0.542338				0.717887			0.75865
																						0.647775						0.258464				0.819451			0.343763
																						0.434196						0.683171				0.837906			0.155301
																						0.623247						0.57374				0.867143
																						0.38552						0.751386				0.620908
																						0.348557						0.576963				0.180431
																						0.328619						0.569859				0.748818
																						0.772181						0.447481				0.524551
																						0.703515						0.472055				0.458311
																						0.367855						0.85098				0.703122
																						0.556595						0.548653				0.790311
																						0.506578						0.338754				0.230813
																						0.586065						0.227334				0.395538
																						0.522873						0.272222				0.327195
																						0.561629						0.740017				0.852201
																						0.324418						0.436097				0.713446
																						0.629672						0.557769				0.655396
																						0.48199						0.713148				0.38492
																						0.311249						0.622363				0.845125
																						0.224738						0.613183				0.360422
																						0.451655						0.665334				0.428506
																						0.259907						0.580897				0.755716
																						0.786128						0.466987				0.668449
																						0.570256						0.567168				0.51897
																						0.53116						0.227304				0.680737
																						0.351169						0.72277
																						0.556427						0.298499
																						0.611246						0.789192
																						0.567425						0.162606
																						0.468371						0.518111
																						0.720886						0.24079
																						0.500512
																						0.275906
																						0.434702
																						0.353775
																						0.807818
																						0.306522
																						0.172261
																						0.501804
																						0.239597
																						0.622455
																						0.579329
																						0.737843
																						0.583177
																						0.217938
																						0.621191
																						0.180775
																						0.711948
																						0.1886
																						0.523474
																						0.386725
																						0.536751
[truncated: 4 more columns]

## Sheet: Leucine
These data correspond to plots in Figure 3, Figure 3--fig sup 3,5-6.
If an ephyra regenerates multiple arms, all arms were measured and included in the table																				creg: # control ephyra that regenerate; treg: # treated ephyra that regenerate
Only regenerates with length > 15% of uncut arm length are included in data analysis																				cnoreg: # control ephyrae that do not regenerate; tnoreg: # treated ephyrae that do not regenerate
Raw ephyra images analyzed are available in CaltechDATA, https://doi.org/10.22002/D1.2076																				CI is 95% confidence intervals
																											Tables for computing effect size statistics
Arm length measurements																				Number of ephyrae that regenerate arm(s)							Use these tables with R-codes to compute effect size metrics RR and OR
ExpID	Exp1						Exp2						Exp4														Number of ephyrae that regenerate arm(s)								METAFOR
	control			treated			control			treated			control			treated				ExpID	# arm	creg	treg	N control	N treated		ExpID	creg	cnoreg	treg	tnoreg					RR	OR
# arm	1	2	3	1	2	3	1	2	3	1	2	3	1	2	3	1	2	3		Exp1	0	86	45	88	89		Exp1	2	86	44	45				mean	4.06	5.81
	0.212199			0.184579	0.804002	0.440499	0.157736	0.629769		0.4034	0.272218		0.258655	0.426439		0.46855	0.912279				1	2	27				Exp2	9	73	17	66				lowCI	2.49	3.35
	0.189628			0.161669	0.603287	0.351282	0.44028	0.425106		0.447276	0.172455		0.451006	0.563178		0.51524	0.867078				2	0	16				Exp4	4	69	39	41				highCI	6.63	10.06
				0.373314	0.51594		0.184864	0.405521		0.5593	0.273289		0.20385			0.744365	0.464114				3	0	1				Exp3	4	80	11	71				p-value	<0.0001	<0.0001
				0.450828	0.204257		0.155921	0.419174		0.408898	0.609847					0.29046	0.56743			Exp2	0	73	66	82	83											***	***
				0.182562	0.194875		0.155859			0.224643	0.220005					0.502786	0.734739				1	7	13
				0.220982	0.577955		0.176062			0.153835	0.232975					0.164583	0.155279				2	2	4
				0.44544	0.460154		0.402283			0.594018	0.41605					0.617081	0.236027				3	0	0				Number of ephyra that regenerate multiple arms
				0.445949	0.215328					0.154617	0.307622					0.496087	0.688698			Exp4	0	69	41	73	80		ExpID	creg	cnoreg	treg	tnoreg					RR	OR
				0.694427	0.317093					0.315217						0.772002	0.216732				1	3	26				Exp1	0	88	17	72				mean	5.96	6.73
				0.196102	0.417233					0.387971						0.349711	0.315987				2	1	13				Exp2	2	80	4	79				lowCI	1.85	2.03
				0.192274	0.923228					0.460304						0.388838	0.152262				3	0	0				Exp4	1	72	13	67				highCI	19.13	22.3
				0.216264	0.572123					0.189339						0.31429	0.636365			Exp3*	0	80	71	84	82										p-value	0.0027	0.0018
				0.155845	0.499489					0.208675						0.710301	0.331691				1	4	11													**	**
				0.163629	0.380602											0.417332	0.181721				2
				0.15007	0.844698											0.576271	0.869602				3
				0.205111	0.239522											0.993135	0.442324			* individual ephyra images were not taken for this exp. Scoring of Exp3 was performed by eye. The effect size significance holds even if Exp3 is excluded.							Number of ephyrae that regenerate rhopalium(a)
				0.399866	0.237575											0.194819	0.30055										ExpID	creg	cnoreg	treg	tnoreg					RR	OR
				0.320522	0.861595											0.154875	0.691335										Exp1	0	88	12	77				mean	6.09	7.22
				0.191706	0.37116											0.36003	0.411713										Exp2	3	79	9	74				lowCI	2.09	2.36
				0.400058	0.195838											0.859241	1.12085										Exp4	0	73	22	58				highCI	17.74	22.04
				0.177501	0.200029											0.349607	0.747923																		p-value	0.0009	0.0005
				0.191379	0.928101											0.374922	0.754029																			***	***
				0.210947	0.484777											0.199908	0.641734
				0.358285	0.175891											0.631942	0.430662										Regenerate arm length
				0.189079	0.468629											0.889329	0.990512										Exp ID	m1i	m2i	sd1i	sd2i	n1i	n2i			R
				0.427514	0.318965											0.350859	0.625598										Exp1	0.200913	0.389833	0.01596	0.220834	2	62		mean	1.65
				0.188477	0.703164																						Exp2	0.322961	0.333903	0.162625	0.143944	11	21		lowCI	1.42
					0.817648																						Exp4	0.380626	0.522573	0.147058	0.25508	5	52		highCI	1.9
					0.18497																														p-value	<0.0001
					0.785693																						m1i: mean measurement, control; m2i: mean measurement, treated									***
					0.343753																						sd1i: standard deviation, control; sd2i: standard deviation, treated
					0.622706																						n1i: sample size, control; n2i: sample size, treated
					0.413216

## Sheet: Body diameter
These data correspond to plots in Figure3-figure supplement 7
Raw ephyra images analyzed are available in CaltechDATA, https://doi.org/10.22002/D1.2076
High food	Exp1 control	Exp 1 treated	Exp 2 control	Exp 2 treated	Exp 3 control	Exp 3 treated	Exp 4 control	Exp 4 treated		Table for computing effect size statistics								METAFOR			Insulin	Exp 1 control	Exp 1 treated	Exp 2 control	Exp 2 treated	Exp 3 control	Exp 3 treated	Exp 4 control	Exp 4 treated	Exp 5 control	Exp 5 treated	Exp 6 control	Exp 6 treated	Exp 7 control	Exp 7 treated		Table for computing effect size statistics								METAFOR			Hypoxia	Exp 1 control
	2411.45	3360.13	1021.14	1748.4	1088.71	1340.92	1291.59	2860.71		Exp ID	m1i	m2i	sd1i	sd2i	n1i	n2i			R			1772.93	2127.38	1555.34	2448.21	1748.4	2700.62	1340.92	3821.54	2889.73	1856.98	4630.89	1059.44	1933.81	2534.45		Exp ID	m1i	m2i	sd1i	sd2i	n1i	n2i			R			1088.71
	1645.84	2304.11	1020.83	1963.89	1301.27	1076.36	1328.62	2571.74		Exp1	1498.93	3184.42	512.306	1387.44	78	74		mean	1.7			1607.72	2284.43	1744.08	2228.38	1963.89	4102.77	1076.36	3643.84	2331.93	1629.75	1873.59	2624.7	1789.67	3063.05		Exp1	1397.88	2187.79	311.885	412.521	85	85		mean	1.4			1301.27
	3226.15	1827.5	1137.18	2287.02	1620.98	1399.16	1165.73	2432.45		Exp2	1379.01	1547.68	290.872	381.947	56	86		lowCI	1.64			1761.64	2554.07	1278.02	2443.37	2287.02	2431.29	1399.16	3582.39	3341.43	2773.42	2779.83	3707.12	3008.77	2906.64		Exp2	1528.18	2436.56	325.41	406.652	88	80		lowCI	1.08			1620.98
	2355.4	4213.34	1297.46	1897.46	1229.25	1064.78	1303.88	3160.57		Exp3	1111.9	1651.38	136.272	531.85	49	82		highCI	1.77			1331.64	2804.07	1515.16	2175.65	1897.46	3829.7	1064.78	3848.07	2926.69	3173.34	4235.99	3283.24	923.499	2275.75		Exp3	1547.68	3257.37	381.947	674.818	86	82		highCI	1.82			1229.25
	3333.12	4575.46	1198.09	1446.13	1131.41	1220.26	1173.71	3980.75		Exp4	1268.33	2820.78	155.941	691.553	87	87		p-value	<0.0001			1407.67	2520.02	1492.44	2124.04	1446.13	2534.65	1220.26	3268.18	2146.23	2894.53	4432.96	2774.83	2994.76	1712.05		Exp4	1651.38	3379.97	531.85	446.122	82	77		p-value	0.011			1131.41
	2494.37	4771.35	1503.03	1105.63	1111.75	1187.92	1167.09	3028.68											***			1339.84	1602.19	1362.71	1440.9	1105.63	3908.64	1187.92	3351.13	1747.99	2573.18	1350.23	2144.85	2403.1	2946.21		Exp5	2610.9	2379.47	416.495	423.623	69	82			*			1111.75
	1754.33	3816.66	1084.9	1546.09	1012.25	1331.89	1082.64	2892.37		m1i: mean measurement, control; m2i: mean measurement, treated												1273.27	2208.31	1630.74	1920.63	1546.09	4570.57	1331.89	3819.99	2362.46	2362.46	2012.4	3930.82	1598.1	1998.69		Exp6	3283.09	3017.89	881.107	881.107	103	91						1012.25
	2141.6	4551.2	1050.26	1754.74	1208.62	1176.66	1189.82	3238.23		sd1i: standard deviation, control; sd2i: standard deviation, treated												1147.38	1899.26	1511.25	2386.59	1754.74	2031.64	1176.66	4247.39	1674.38	1756.3	2195.32	3350.61	2125.13	2264.04		Exp7	1989.89	2331.06	509.61	463.068	26	38						1208.62
	1481.01	1577.14	1627.22	1609.92	1159.59	1314.79	1169.89	3116.61		n1i: sample size, control; n2i: sample size, treated												914.193	2529.98	1910.44	2019.08	1609.92	3438.37	1314.79	4014.79	2172.46	2619.21	3625.54	3070.28	1969.1	2499.92														1159.59
	1792.77	1500.23	1025.69	1332.86	1290.93	1361.91	1259.54	2838.08														1714.54	2535.47	1629.29	2192.58	1332.86	2793.82	1361.91	3361.45	1838.11	2073.94	1548.3	3025.21	1483.5	2947.3		m1i: mean measurement, control; m2i: mean measurement, treated												1290.93
	2036.15	2182.12	946.02	1392.35	1080.65	913.808	1190.37	3106.21														1756.25	2194.06	1586.97	2579.43	1392.35	3123.4	913.808	3639.34	1712.97	2440.89	4509.98	2299.51	1688.13	2159.65		sd1i: standard deviation, control; sd2i: standard deviation, treated												1080.65
	2056.15	4796.23	1497.73	1465.64	1049.9	1128.29	1283.39	3359.65														1518.48	2139.52	1687.53	2722.22	1465.64	2910.92	1128.29	3811.81	2153.03	2625.2	3244.22	2681.78	2018.02	2487.41		n1i: sample size, control; n2i: sample size, treated												1049.9
	2355.4	1707.19	1233.69	1555.34	1151.56	1461.12	1023.89	2434.16														1204	1526.83	1768.59	2069.87	1555.34	2772.78	1461.12	2568.39	3063.88	1888.21	3874.42	3750.97	1654.8	2403.49														1151.56
	1585.76	5315.07	1380.84	1601.08	1157.38	1195.25	1147.58	2840.12														1673.71	2005.63	1240.31	1498.87	1601.08	1431.33	1195.25	3336.14	2317.42	3390.74	1544.56	3789.75	1919.41	1827.63														1157.38
	1459.79	5585.08	1248.04	1343.36	1033.42	1015.5	1258.21	2432.92														1343.36	2061.49	1463.52	2070.08	1343.36	3740.36	1015.5	3531.16	2670.24	2589.03	3283.87	1226.02	2396.16	1924.22														1033.42
	2631.27	1854.74	1350.5	1534.28	1192.95	1233.69	1015.47	1536.16														1339.84	2251.82	1194.75	2019.08	1534.28	2908.02	1233.69	3826.06	2685.43	1765.1	1657.73	2781.98	1553.37	2290.03														1192.95
	1875.56	1255.87	1214.31	1138.45	1523.87	1112.17	1246.43	3207.54														1437.92	2092.75	1876.77	1803.38	1138.45	1977.1	1112.17	3830.66	3277.18	2432.92	3309.11	2601.3	1504.39	1262.66														1523.87
	1346.11	2992.83	1062.51	1617.62	1088.83	994.054	1326.94	3309.74														1460.28	1978.67	1938.42	2394.32	1617.62	3105.78	994.054	3595.83	3354	2174.37	2396.16	3817.52	1982.2	2497.89														1088.83
	875.185	3372.21	1345.19	1606.61	933.801	1003.63	1231.44	4314.81														1011.73	3431.26	1447.36	2359.47	1606.61	2938.74	1003.63	3563.76	2266.59	2349.41	1669.82	4123.56	1311.5	1694.55														933.801
	1596.37	3062.52	1138.49	1903.22	995.895	1431.67	1240.28	2186.77														1333.42	1892.31	1779.68	1431.33	1903.22	3527.05	1431.67	3501.41	2253.4	2600.08	4195.37	2516.7	2298.39	1588.38														995.895
	1149.4	3288.38	1323.74	1355.64	1020.15	1048.8	1229.55	3464.17														1847.7	2020.03	1116.01	2128.43	1355.64	3940.15	1048.8	2932.79	2666.78	2516.33	3434.89	3860.34	1851.75	2775.58														1020.15
	1252.55	3629.17	1487.59	1819.79	1105.5	1396.12	1240.5	3426.13														1058.74	2500.87	1530.8	2385.78	1819.79	2291.99	1396.12	3091.6	3277.18	2559.58	4748.44	3964.5	2379.61	2658.01														1105.5
	1196.68	3201.99	1164.29	1928.93	929.092	1414.6	1051.95	2984.48														1873.62	1459.67	2196.02	2486.4	1928.93	3162.18	1414.6	3568.08	2171.5	2712.24	1313.09	1530.57	1800.1	1929.38														929.092
	1180.74	4752.28	1032.08	1995.27	1087.8	1416.24	1408.47	2922.18														1309.91	1490.36	1755.75	2130.09	1995.27	4311.99	1416.24	3648.67	2421.02	2320.11	4984.01	1555.44	2000.54	2830.33														1087.8
	1621.79	3471.1	1569.04	2952.84	1014.28	1032.81	1010.68	2250.01														1542.73	2444.58	1181.3	1970.28	2952.84	4361.65	1032.81	4574.62	2635.66	1965.11	3318.53	2193.7	3031.8	2049.73														1014.28
	1337.33	3326.88	1224.68	1668.76	1041.25	1224.48	1203.46	2806.72														1403.67	3226.36	1691.64	1569.73	1668.76	3101.78	1224.48	2305.83	3198.95	2556.42	2904.73	1661.13	2117.61	2437.19														1041.25
	1438.09	3421.81	1126.44	1387.35	1082.12	1078.83	1270.61	2731.52														1116.01	2700.45	1652.01	2249.26	1387.35	2997.79	1078.83	3744.55	2739.63	1509.6	2248.06	2356.42		2022.83														1082.12
	2030.24	4382.89	923.049	1191.28	1253.97	987.84	1243.88	1425.18														1510.96	1836.86	1416.68	1718.8	1191.28	2720.1	987.84	2896.25	3086.58	2962.01	3208.11	3824.94		2286.9														1253.97
	1118	4486.55	1002.04	1097.7	1216.58	1132.93	1512.68	3148.48														1252.18	1890.2	1653.44	2587.16	1097.7	2330.9	1132.93	3630.46	2511.82	2053.78	1240.31	4209.75		1552.32														1216.58
	1217.93	5313.11	1285.55	1965.62	961.57	2080.86	1237.79	1405.91														1345.67	2077.22	1601.91	2871.16	1965.62	2546.12	2080.86	3117	2792.35	2847.51	3524.23	2956.75		2409.53														961.57
	1397.77	5931.39	1653.01	1468.46	1066.05	2272.63	1413.57	2464.35														1153.81	2638.28	2058.98	3055.31	1468.46	2821.74	2272.63	2966.24	2330.94	2252.17	2850.76	2146.59		1851.62														1066.05
	2209.18	3826.82	1302.39	1513.01	1209.65	2453.88	1296.99	4061														1052.44	2339.71	2104.88	2877.96	1513.01	3640.43	2453.88	3987.17	3128.75	2683.45	4067.82	4076.27		2685.78														1209.65
	1868.07	5634.48	1450.15	1252.18	1110.97	2146.21	1406.35	3817.39														1190.78	2872.61	1994.76	2692.5	1252.18	2943.01	2146.21	3561.56	2456.09	2376.5	1365.38	4000.84		3236.73														1110.97
	1410.55	2648.08	2153.06	1583.89	1014.28	2328.08	1451.29	2949.81														1290	2328.36	1600.62	2104.1	1583.89	3512.51	2328.08	3156.8	3019.97	2200.68	1734.05	3047.75		2714.45														1014.28
	1185.82	2990.36	1680.47	1176.66	1207.8	2030.59	1258.06	3664.16														1184.8	2060.84	2147.45	2720.27	1176.66	3388.01	2030.59	2471.3	2502.33	2083.28	1679.2	1826.4		2730.84														1207.8
	968.843	2578.3	1618.06	1335.52	1014.28	2218.84	1790.14	1908.18														1512.23	3267.18	1834.57	2873.02	1335.52	4057.74	2218.84	4179.74	2740.72	3319.64	4177.7	1747.34		2246.31														1014.28
	1096.14	2769.16	1171.28	1569.82	997.674	2151.32	1138.84	3680.52														1322.61	2108.53	1916.08	2930.11	1569.82	2376.65	2151.32	2638.06	2538.46	2638.55	3131.41	3966.97		2211.99														997.674
	1135.75	3998.42	1370.13	1374.82	957.875	2158.16	1246.51	2467.26														1354.88	2299.66	1795.49	2778.21	1374.82	3839.45	2158.16	2654.88	2003.2	2320.61	4433.43	4736.62		2666.78														957.875
	1485.6	2740.72	1688.13	1941.85	1107.27	2329.91	1176.88	2013.44														1101.34	2145.52	1960.65	3595.79	1941.85	2034.26	2329.91	3352.59	3325.49	1668.85	3515.63	3441.76																1107.27
	1658.06	4235.88	1767.72	1469.37	1203.62	2312.12	1197.56	3401.69														1136.37	2000.31	1372.77	2463.21	1469.37	3602.69	2312.12	3655.56	2192.58	2415.76	1796.25	3797.86																1203.62
	1944.72	1413.94	1891.78	2143.39	1087.8	2394.99	1478.99	2774.25														1136.37	1799.76	1408.83	2632.55	2143.39	4530.66	2394.99	2385.78	2447.79	2131.97	1493.44	3220.36																1087.8
	1211.52	4915.61	1624.58	1653.53	1049.82	2604.78	1448.39	2670.24														1050.47	2724.56	1852.5	2925.11	1653.53	3785.41	2604.78	3073.94	2726.77	2551.99	1446.27	3926.09																1049.82
	2033.35	3376.12	2087.13	1669.82	929.092	2515.5	1178.55	1980.92														1475.7	2208.58	1989.93	2774.54	1669.82	3613.88	2515.5	2854.37	2671.54	1956.62	1548.15	2067.58																929.092
	1185.93	1481.01	1429.34	2053.15	1131.94	2314.61	1570.85	2039.22														1651.2	2200.66	1756.84	2513.08	2053.15	3688.39	2314.61	2773.52	2548.45	2456.09	2435.58	2564.28																1131.94
	1254.44	4647.18	1277.56	1205.6	1165.73	2713.91	1440.96	3106.21														1245.66	2095.08	1935.13	2938.38	1205.6	2383.92	2713.91	3225.4	2752.76	2253.3	1548	1484.12																1165.73
	1494.15	4848.19	1455.19	2227.78	1047.32	2451.31	1248.53	3661.32														1457.24	2224.93	2113.43	2862.03	2227.78	3491.39	2451.31	3555.24	3447.05	1932.73	3790.65	2525.77																1047.32
	1178.01	4176.54	1241.09	1276.98	1023.07	1740.88	1216.81	3272.52														1691.21	2709.8	1271.52	2568.74	1276.98	2531.44	1740.88	4196.13	2570.13	1764.18	2222.11	3487.84																1023.07
	1368.44	5310.15	1969.99	2211.25	916.043	2155.57	1234.39	3229.44														1114.16	2175.92	1636.26	3191.1	2211.25	3140.78	2155.57	3061.65	2380.59	2150.97	1279.38	3064.26																916.043
	1090.08	5357.82	1815.24	1363.04	1167.73	2481.39	1198.49	2704.3														1429.26	1834.85	1446.85	2993	1363.04	2874.25	2481.39	2891.9	2277.88	2770.83	1380.19	3097.27																1167.73
	1249.56	3942.95	1230.99	1259.83		2286.31	1194.28	2377.96														1379.87	2506.31	1600.43	2802.49	1259.83	2925.26	2286.31	3199.85	3107.47	2498.54	3346.83	4520.12
	822.217	4032.44	1771.44	1900.5		1728.58	1294.11	2515.5														1049.2	1556.96	2263.68	2705.38	1900.5	3027.98	1728.58	4048.4	2584.74	2019.28	4970.78	3882.94
	1633.01	4135.61	1561.7	1341.6		2801.28	1388.52	3108														1343.36	1789.54	1873.22	2778.74	1341.6	4256.61	2801.28	3041.29	2562.92	2107	4041.31	2651.13
	1631.5	5158.3	1529.07	1899.26		2095.65	1192.95	2305.32														1032	2594.64	1493.53	2789.64	1899.26	2899.67	2095.65	3488.17	2432.45	2234.86	3146.35	2029.9
	1311.29	1935.12	1434.74	1865.62		2446.09	1363.77	3985.86														1516.04	1811.32	1369.54	2609.98	1865.62	4024.84	2446.09	2540.77	2279.1	2195.32	1573.18	2806.64
	1190.31	1315.9	1150.63	1216.98		1962.01	1300.73	3433.61														1152.91	2474.05	2250.84	2915.39	1216.98	3494.69	1962.01	3298.99	2775.08	2498.54	3884.9	2975.56
	1091.27	3311.63	1378.07	1319.71		2021.27	1143.83	2753.76														1669.2	2453.34	1699.58	2332.74	1319.71	2873.17	2021.27	3483.84	2241.06	2717.6	3762.01	3157.57
	1083.74	2012.4		1434.45		2587.16	1344.47	2227.4														1420.12	2212.86	1841.69	2395.81	1434.45	2861.46	2587.16	3426.3	2836.7	3015.68	5806.95	2777.58
	1363.11	1366.56		1120		1146.35	1325.46	3069.99														1584.73	2264.79	1545.04	2396.98	1120	4261.75	1146.35	3592.49	3224.28	2287.7	1775.15	4245.47
	858.42	5008.16		1230.99		1627.83	1149.61	3283.87														3373.3	1720.34	1323.43	2232.69	1230.99	3403.04	1627.83	3337.91	2757.79	2624.41	4776.39	2367.44
	999.75	2156.12		1445.55		1323.06	1200.36	1721.21														1909.51	2064.29	1069.77	2455.81	1445.55	3746.17	1323.06	3586.07	2625.64	2143.65	4220.25	4891.05
	1334.58	1299.46		1428.7		1589.21	1589.51	1775.15														1171.24	1635.36	1124.15	2468.96	1428.7	3198	1589.21	3305.26	2394.33	2075.17	4305.64	2956.78
	1118.68	1163.78		1197.76		2424.22	1872.09	1709.49														1532.63	1902.37	1118.21	2883.24	1197.76	4024.54	2424.22	3302.8	2343.6	1720	3762.75	2038.76
	1290	2107.11		1395.35		1037.15	1245.91	3499.95														1297.32	2309.99	1215.07	2481.16	1395.35	3526	1037.15	3376.51	2702.68	2890.69	4290.64	3363.15
	1562.46	2049.84		1087.36		1677.24	1277.86	3230.8														1173.89	2735.29	1265.84	2074.37	1087.36	2769.41	1677.24	3406.3	2202.05	2765.57	4959.47	3305.27
	2096.25	1663.86		1125.34		1254.19	1259.54	1962.63														1301.87	2081.48	1546.12	2866.26	1125.34	3566.38	1254.19	3658.79	3137.09	2821.75	4467.55	3805.74
	1119.15	2099.97		1321.61		1356.18	1161.24	3603.41														1216.22	2076.08	1443.42	2459.84	1321.61	3540.9	1356.18	2980.57	3089.2	2100.41	3794.25	3571.33
	1173.92	2067.8		1187.43		1587.72	1586.22	3360.88														1781.92	1831.3	1433.93	2418.85	1187.43	3509.18	1587.72	3292.08	2875.94	2107.66	2373.39	3498.96
	1351.52	946.244		1641.55		1802.31	948.476	3441.41														1035.58	1727.72	1097.71	2003.49	1641.55	4126.03	1802.31	3085.9	2710.36	2408	1560.05	3108.59
	1163.01	2080.06		1651.05		1389.8	1027.53	2087.27														1325.74	2121.95	1380.54	2339.77	1651.05	3727.64	1389.8	2892.11	2521.37	2701.91	4305.64	3432.8
	1550.1	2221.27		1493.06		1114.82	1231.44	3605.66														1153.56	2165.43	1483.22	2459.66	1493.06	2678.18	1114.82	3094.09		1674.38	3828.81	3754.81
	1468.17	2025.34		1229.3		1278.37	1248	3480.68														1362.71	2041.59	1141.12	2645.95	1229.3	2477.99	1278.37	3566.09		2229.48	4619.35	3288.38
	1087.09	1277.4		1143.45		1221.68	1429.78	2129.37														1216.47	2186.77	1494.9	2736.15	1143.45	4163.68	1221.68	3684.58		2986.72	4966.13	3194.9
	1025.05	2076.95		1494.45		2243.2	1148.31	2487.41														1777.21	2233.68	1404.92	2707.02	1494.45	3094.9	2243.2	3624.35		3146.35	5482.5	1453.91
	970.184	1417.37		2510.47		1402.93	1223.54	1474.91														1602.15	2771.12	1232.27	2319.13	2510.47	2429.1	1402.93	3415.36		3336.66	1893.95	3233.95
	885.555			1198.59		1535.43	1265.23	3226.79														1268.4	1747.47	1265.32	2672.7	1198.59	2708.93	1535.43	3449.79		2060.08	1744.82	3531.3
	1048.12			2772.99		1455.1	1247.33	3314.35														1471.39	1685.95	1124	2437.91	2772.99	3133.85	1455.1	3258.07		2320.11	4649.02	3398.09
	1285.26			1150.49		1760.54	1528.27	2434.16														1264	2031.13	1076.98	2361.48	1150.49	2679.01	1760.54	3506.31		2405.41	3295.19	3546.2
	980.448			1693.05		1131.81	1221.93	3428.76														1367.28	3115.91	1041.31	2116.72	1693.05	4299.48	1131.81			2538.46	4294.19	4130.3
				1427.3		1274.66	1228.03	3289.78														1468.62	1644.38	1159.35	2016.51	1427.3	3967.09	1274.66			1538.41	3116.02	2472.87
				1003.97		1464.53	1154.79	1471.61														1453.07	1735.41	1070.78	2126.47	1003.97	3404.78	1464.53			2389.5	1955.08	1616.08
				1638.91		1298.68	1161.56	3088														1456.39	1673.45	1144.03		1638.91	3211.29	1298.68			2571.48	3128.75	2253.3
				1156.4		1535.53	1220.79	3157.57														1339.18	2348.29	1223.33		1156.4	4294.66	1535.53			2085.5	4121.95	3204.58
				1095.59			1337.59	1760.51														1501.4	1772.93	1161		1095.59						3827.24	3576.63
				1806.92			1106.59	3268.28														1331.89	2561.47	1221.96		1806.92						4610.84	2339.45
				1367.83			1199.82	2283.66														1357.87	2055.53	1182.66		1367.83						3451.27	4179.03
				1143.83			1142.53	3301.84																1132.85		1143.83						4072.82	4293.55
							1484.54	1471.61																1397.08								3595.71	2085.94
																								960.595								3747.24	2909.82
																																3053.45	3036.68
																																4449.82	1216.6
																																3269.49	1625.06
																																4306.07
																																4548.71
																																5001.05
																																4098.44
																																4412.74
																																3588.95
																																3057.61
																																4154.12
																																3395.23
																																3612.06
																																3312.12
																																3184.11
[truncated: 35 more columns]
