# Supplementary material for: A conserved strategy for inducing appendage regeneration in moon jellyfish, Drosophila, and mice
Source: eLife. 2021 Dec 7;10:e65092. doi: 10.7554/eLife.65092 (PMC8782573; doi:10.7554/eLife.65092)
Supplement: Figure 5—source data 1. [file elife-65092-fig5-data1.xlsx]

## Sheet: ReadMe
This spreadsheet and the DrosophilaCode.m correspond to the plots in Figure 5 and the related figure supplements
Each row in the sheet corresponds to a particular movie TIFF file available in CaltechDATA, https://doi.org/10.22002/D1.2157
For each movie TIFF, this spreadsheet documents the image magnification and the frame for which length was scored
To measure the length of a tibia stump:
	- Fiji was used to draw a minimal circle that encloses the stump
	- Using circle instead of line ensures rotation-invariant measurement
	- Tibia stump can be defined either from the end of the femur or the end of the femoral-tibial joint. Since relative change was the goal of the quantitation, it was only necessary to be consistent internally within the time series measured.
	- See Figure 5--figure supplement 1 that confirms there was no bias introduced by diffrences in the initial length of tibia stump.
	- Images measured fell into two criteria: the leg stump was planar in the image (the majority of data fall in this category) or the leg stumps were in similar orientations across the time series, enabling comparison.
	- The same protocol was applied for all datasets, control and treated stumps. Blinding was performed on a subset of the dataset.
To plot the data, the Matlab m-file DrosophilaCode.m reads this spreadsheet, scales the magnification differences, and converts pixel lengths to microns.
	- The Matlab code relies on the column titles to read the data. Changing the column titles will disrupt the code.
	- If multiple lengths are measured for a given day for a given fly, they are averaged for the plots and statistical analyses
	- More details of data analysis are described in Methods
The sheet "SegmentReformed" lists separately the leg stumps that reformed the segment, showed joint-like structure, and in few, the beginning of the tarsal segmentt .
	- Not all these datasets could be quantified based on the criteria described above. But morphological changes across the time-lapse videos qualitatively demonstrate the segment reformation.

## Sheet: LengthTracking
ExperimenterID	Treatment	FlyID	Sex	CutLeg	SideCut	ExperimentID	FileName__tiff_	DPA	Length_pixel_	FrameMeasured	FrameMag
LG	LGI	0619 A FH	F	H	L	0619	A FH - 0 DPA	0	380	1	4
	LGI	0619 A FH				0619	A FH - 9 DPA	9	393	18	4		Legend
	LGI	0619 A FH				0619	A FH - 13 DPA	13	412	23	4		Treatment: Control or LGI (leucine/glutamine/insulin) as described in the main text
	LGI	0619 A FH				0619	A FH - 22 DPA	22	378	10	3.2		Sex: F = female, M = male
	LGI	0619 A FH				0619	A FH - 22 DPA	22	911	11	8		CutLeg: H = hindlimb, M = midlimb, F = forelimb
	LGI	0619 A MM	M	M	L	0619	A MM - 0 DPA	0	345	22	4		SideCut: L = left, R = right
	LGI	0619 A MM				0619	A MM - 22 DPA	22	260	10	3.2
	LGI	0619 A MM				0619	A MM - 22 DPA	22	691	14	8		ExperimentID and FileName__tiff_:
	LGI	0619 B FH	F	H	L	0619	B FH - 0 DPA	0	568	54	4			Combine this information to find where the file is located in CaltechDATA
	LGI	0619 B FH				0619	B FH - 13 DPA	13	570	25	4			E.g., The file A FH - 0 DPA can be found under the folder 0619
	LGI	0619 B FH				0619	B FH - 22 DPA	22	453	25	3.2
	LGI	0619 B FH				0619	B FH - 22 DPA	22	1112	44	8		DPA = days post amputation
	LGI	0619 B FM	F	M	R	0619	B FM - 0 DPA	0	489	26	4		Length_pixel_ = Length of tibia stump in pixel number, measured in Fiji
	LGI	0619 B FM				0619	B FM - 13 DPA	13	491	8	4		FrameMeasured = video frame measured
	LGI	0619 B FM				0619	B FM - 22 DPA	22	392	19	3.2		FrameMag = image magnification setting
	LGI	0619 B FM				0619	B FM - 22 DPA	22	988	4	8
	LGI	0619 B MH	M	H	R	0619	B MH - 0 DPA	0	427	7	4
	LGI	0619 B MH				0619	B MH - 13 DPA	13	460	27	4
	LGI	0619 B MM	M	M	L	0619	B MM - 0 DPA	0	333	1	4
	LGI	0619 B MM				0619	B MM - 13 DPA	13	365	19	4
	LGI	0619 B MM				0619	B MM - 22 DPA	22	297	48	3.2
	LGI	0619 B MM				0619	B MM - 22 DPA	22	775	10	8
	LGI	0619 C MM	M	M	R	0619	C MM - 0 DPA	0	560	1	4
	LGI	0619 C MM				0619	C MM - 0 DPA	0	578	19	4
	LGI	0619 C MM				0619	C MM - 6 DPA 2	6	621	27	4
	LGI	0619 C MM				0619	C MM - 11 DPA	11	654	18	4
	LGI	0619 C MM				0619	C MM - 11 DPA	11	653	29	4
	LGI	0619 C MM				0619	C MM - 11 DPA 2	11	1283	20	8
	LGI	0619 C FM	F	M	L	0619	C FM - 0 DPA	0	446	5	4
	LGI	0619 C FM				0619	C FM - 22 DPA X	22	1016	11	8
	LGI	0619 E FM	F	M	L	0619	E FM - 0 DPA	0	446	1	4
	LGI	0619 E FM				0619	E FM - 13 DPA	13	446	15	4
	LGI	0619 E FM				0619	E FM - 22 DPA	22	913	32	8
	LGI	0619 G MM	M	M	R	0619	G MM - 0 DPA	0	339	4	4
	LGI	0619 G MM				0619	G MM - 13 DPA	13	316	27	4
	LGI	0619 G MM				0619	G MM - 22 DPA	22	644	21	8
	LGI	0619 G MM				0619	G MM - 30 DPA	30	668	23	8
	LGI	0623 A MF	M	F	R	0623	A MF - 0 DPA	0	172	3	2
	LGI	0623 A MF				0623	A MF - 14 DPA	14	316	14	3.2
	LGI	0623 A MF				0623	A MF - 22 DPA	22	319	3	3.2
	LGI	0623 B MF	M	F	L	0623	B MF - 0 DPA	0	215	11	2
	LGI	0623 B MF				0623	B MF - 14 DPA	14	853	36	8
	LGI	0623 B MF				0623	B MF - 14 DPA	14	343	4	3.2
	LGI	0623 C FF	F	F	L	0623	C FF - 0 DPA	0	268	3	2
	LGI	0623 C FF				0623	C FF - 14 DPA	14	425	5	3.2
	LGI	0623 C FH	F	H	L	0623	C FH - 0 DPA	0	317	12	2
	LGI	0623 C FH				0623	C FH - 14 DPA	14	497	19	3.2
	LGI	0623 C FH				0623	C FH - 22 DPA	22	1265	11	8
	LGI	0623 C FH				0623	C FH - 22 DPA	22	511	17	3.2
	LGI	0623 D FH	F	H	L	0623	D FH - 0 DPA	0	518	22	4
	LGI	0623 D FH				0623	D FH - 0 DPA	0	503	2	4
	LGI	0623 D FH				0623	D FH - 14 DPA	14	443	4	3.2
	LGI	0623 D FH				0623	D FH - 14 DPA	14	441	1	3.2
	LGI	0623 D FH				0623	D FH - 22 DPA	22	438	24	3.2
	LGI	0623 D FH				0623	D FH - 22 DPA	22	1126	9	8
	LGI	0623 E MH	M	H	L	0623	E MH - 0 DPA	0	197	8	2
	LGI	0623 E MH				0623	E MH - 14 DPA	14	368	4	3.2
	LGI	0623 E MH				0623	E MH - 22 DPA 3	22	473	10	3.2
	LGI	0623 E MH				0623	E MH - 29 DPA X	29	1272	5	8
	LGI	0623 F FF	F	F	L	0623	F FF - 0 DPA	0	190	1	2
	LGI	0623 F FF				0623	F FF - 14 DPA	14	306	1	3.2
	LGI	0623 F FH	F	H	R	0623	F FH - 0 DPA	0	187	2	2
	LGI	0623 F FH				0623	F FH - 14 DPA	14	293	6	3.2
	LGI	0623 F FH				0623	F FH - 22 DPA	22	732	8	8
	LGI	0623 F MM	M	M	L	0623	F MM - 0 DPA	0	115	5	2
	LGI	0623 F MM				0623	F MM - 14 DPA	14	303	1	3.2
	LGI	0623 F MM				0623	F MM - 14 DPA	14	736	11	8
	LGI	0623 F MM				0623	F MM - 22 DPA	22	324	17	3.2
	LGI	0623 G FF	F	F	L	0623	G FF - 0 DPA	0	171	4	2
	LGI	0623 G FF				0623	G FF - 14 DPA	14	252	11	3.2
	LGI	0623 G FF				0623	G FF - 19 DPA	19	264	2	3.2
	LGI	0623 G MH	M	H	R	0623	G MH - 0 DPA	0	237	12	2
	LGI	0623 G MH				0623	G MH - 14 DPA	14	452	7	3.2
	LGI	0623 G MM	M	M	L	0623	G MM - 0 DPA	0	216		2
	LGI	0623 G MM				0623	G MM - 14 DPA	14	399		3.2
	LGI	0623 G MM				0623	G MM - 14 DPA	14	1015		8
	LGI	0623 G MM				0623	G MM - 22 DPA 3,2X	22	409	1	3.2
	LGI	0623 G MM				0623	G MM - 22 DPA 2	22	995	19	8
	LGI	0623 G MM				0623	G MM - 29 DPA	29	1008	12	8
LG	Control	0713 A FF	F	F	L	0713	A FF - 0 DPA	0	533	13	8
	Control	0713 A FF				0713	A FF - 13 DPA	13	511	12	8
	Control	0713 A FF				0713	A FF - 22 DPA	22	535	3	8
	Control	0713 A FH	F	H	L	0713	A FH - 0 DPA 2	0	897	18	8
	Control	0713 A FH				0713	A FH - 13 DPA	13	862	4	8
	Control	0713 A FH				0713	A FH - 22 DPA	22	904	5	8
	Control	0713 A FM	F	M	L	0713	A FM - 0 DPA	0	655	16	8
	Control	0713 A FM				0713	A FM - 13 DPA	13	623	18	8
	Control	0713 A MM	M	M	R	0713	A MM - 0 DPA	0	811	5	8
	Control	0713 A MM				0713	A MM - 13 DPA	13	820	11	8
	Control	0713 A MM				0713	A MM - 22 DPA	22	803	2	8
	Control	0713 B FF	F	F	L	0713	B FF - 0 DPA 2	0	792	7	8
	Control	0713 B FF				0713	B FF - 13 DPA	13	799	2	8
	Control	0713 B FM	F	M	R	0713	B FM - 0 DPA	0	979	9	8
	Control	0713 B FM				0713	B FM - 13 DPA	13	956	11	8
	Control	0713 B FM				0713	B FM - 22 DPA	22	944	8	8
	Control	0713 B MH	M	H	L	0713	B MH - 0 DPA	0	837	9	8
	Control	0713 B MH				0713	B MH - 13 DPA	13	819	3	8
	Control	0713 B MH				0713	B MH - 22 DPA	22	844	2	8
	Control	0713 B MM	M	M	L	0713	B MM - 0 DPA	0	555	11	8
	Control	0713 B MM				0713	B MM - 13 DPA	13	539	5	8
	Control	0713 B MM				0713	B MM - 22 DPA	22	538	3	8
	Control	0713 C FF	F	F	R	0713	C FF - 0 DPA	0	678	27	8
	Control	0713 C FF				0713	C FF - 13 DPA	13	651	4	8
	Control	0713 C FF				0713	C FF - 22 DPA	22	679	16	8
	Control	0713 C FM	F	M	L	0713	C FM - 0 DPA	0	932	8	8
	Control	0713 C FM				0713	C FM - 13 DPA AND X	13	930	12	8
	Control	0713 C MM	M	M	R	0713	C MM - 0 DPA	0	591	13	8
	Control	0713 C MM				0713	C MM - 13 DPA	13	599	4	8
	Control	0713 C MM				0713	C MM - 22 DPA	22	590	5	8
	Control	0713 D FF	F	F	R	0713	D FF - 0 DPA	0	575	5	8
	Control	0713 D FF				0713	D FF - 13 DPA 2	13	561	8	8
	Control	0713 D FH	F	H	R	0713	D FH - 0 DPA 2	0	1040	4	8
	Control	0713 D FH				0713	D FH - 13 DPA	13	1012	9	8
	Control	0713 D MM	M	M	R	0713	D MM - 0 DPA	0	636	11	8
	Control	0713 D MM				0713	D MM - 13 DPA	13	628	8	8
	Control	0713 D MM				0713	D MM - 22 DPA	22	629	1	8
LG	LGI	0626 A FH	F	H	L	0626	A FH - 0 DPA	0	495	9	3.2
	LGI	0626 A FH				0626	A FH - 25 DPA	25	1247	23	8
	LGI	0626 A FM	F	M	R	0626	A FM - 0 DPA 2	0	189	5	3.2
	LGI	0626 A FM				0626	A FM - 18 DPA	18	548	8	8
	LGI	0626 A FM				0626	A FM - 25 DPA	25	594	19	8
	LGI	0626 A MH	M	H	R	0626	A MH - 0 DPA 2	0	375	16	3.2
	LGI	0626 A MH				0626	A MH - 18 DPA	18	1020	6	8
	LGI	0626 A MM	M	M	L	0626	A MM - 0 DPA	0	398	8	3.2
	LGI	0626 A MM				0626	A MM - 9 DPA	9	447	24	3.2
	LGI	0626 A MM				0626	A MM - 18 DPA 2	18	462	27	3.2
	LGI	0626 B FH	F	H	R	0626	B FH - 0 DPA	0	495	1	3.2
	LGI	0626 B FH				0626	B FH - 18 DPA 2	18	512	17	3.2
	LGI	0626 B MM	M	M	L	0626	B MM - 0 DPA	0	385	3	3.2
	LGI	0626 B MM				0626	B MM - 0 DPA 2	0	379	4	3.2
	LGI	0626 B MM				0626	B MM - 9 DPA	9	1101	24	8
	LGI	0626 B MM				0626	B MM - 9 DPA	9	442	5	3.2
	LGI	0626 B MM				0626	B MM - 25 DPA	25	1136	7	8
	LGI	0626 B MM				0626	B MM - 30 DPA	30	1140	5	8
	LGI	0626 C FH	F	H	R	0626	C FH - 0 DPA	0	448	1	3.2
	LGI	0626 C FH				0626	C FH - 9 DPA	9	1140	15	8
	LGI	0626 C FH				0626	C FH - 18 DPA 2	18	471	1	3.2
	LGI	0626 C FH				0626	C FH - 18 DPA	18	1176	12	8
	LGI	0626 C FH				0626	C FH - 26 DPA	26	1172	1	8
	LGI	0626 C FM	F	M	R	0626	C FM - 0 DPA	0	171	2	3.2
	LGI	0626 C FM				0626	C FM - 0 DPA 2	0	172	1	3.2
	LGI	0626 C FM				0626	C FM - 9 DPA	9	672	22	8
	LGI	0626 D FM				0626	D FM - 9 DPA	9	406	18	3.2
	LGI	0626 D FM				0626	D FM - 18 DPA	18	1069	21	8
	LGI	0626 D FM				0626	D FM - 30 DPA-1	30	1075	10	8
	LGI	0626 D MM	M	M	L	0626	D MM - 0 DPA	0	388	1	3.2
	LGI	0626 D MM				0626	D MM - 9 DPA	9	962	15	8
	LGI	0626 D MM				0626	D MM - 18 DPA	18	945	18	8
	LGI	0626 D MM				0626	D MM - 26 DPA	26	983	1	8
IL-LG	Control	1858 A FH	F	H	R	1858	FH-8X-A	0	1112	12	8
	Control	1858 A FH				1858	FH-8X-A-7-DPA	7	1176	18	8
	Control	1858 A FH				1858	FH-8X-A-14-DPA	14	1160	16	8
	Control	1858 A MH	M	H	L	1858	MH-8X-A	0	679	7	8
	Control	1858 A MH				1858	MH-8X-A	0	693	10	8
	Control	1858 A MH				1858	MH-8X-A-7-DPA	7	632	12	8
	Control	1858 A MH				1858	MH-8X-A-14-DPA	14	654	20	8
	Control	1858 A MH				1858	MH-8X-A-14-DPA 2	14	670	10	8
	Control	1858 A MH				1858	MH-8X-A-14-DPA 3	14	677	14	8
	Control	1858 A MM	M	M	L	1858	MM-8X-A	0	817	2	8
	Control	1858 A MM				1858	MM-8X-A-7-DPA	7	851	18	8
	Control	1858 A MM				1858	MM-8X-A-14-DPA	14	852	15	8
	Control	1858 B FF	F	F	R	1858	FF-8X-B	0	787	6	8
	Control	1858 B FF				1858	FF-8X-B-7-DPA	7	795	3	8
	Control	1858 B FF				1858	FF-8X-B-14-DPA	14	784	3	8
	Control	1858 B FH	F	H	L	1858	FH-8X-B	0	968	2	8
	Control	1858 B FH				1858	FH-7X-B-7-DPA	7	952	18	8
	Control	1858 B MF	M	F	L	1858	MF-8X-B	0	836	14	8
	Control	1858 B MF				1858	MF-8X-B-7-DPA	7	834	14	8
	Control	1858 B MH	M	H	R	1858	MH-8X-B	0	997	7	8
	Control	1858 B MH				1858	MH-8X-B-7-DPA	0	997	14	8
	Control	1858 B MH				1858	MH-8X-B-14-DPA	14	1001	1	8
	Control	1858 B MH				1858	MH-8X-B-14-DPA-1	14	1007	7	8
	Control	1858 C FH	F	H	L	1858	FH-8X-C	0	933	3	8
	Control	1858 C FH				1858	FH-8X-C-7-DPA	7	929	17	8
	Control	1858 C FM	F	M	R	1858	FM-8X-C	0	888	12	8
	Control	1858 C FM				1858	FM-8X-C-7-DPA	7	884	12	8
	Control	1858 C FM				1858	FM-8X-C-14-DPA	14	868	7	8
	Control	1858 C MM	M	M	L	1858	MM-8X-C	0	751	11	8
	Control	1858 C MM				1858	MM-8X-C-7-DPA	7	767	1	8
	Control	1858 C MM				1858	MM-8X-C-14-DPA	14	744	13	8
	Control	1858 D FH	F	H	R	1858	FH-8X-D	0	810	17	8
	Control	1858 D FH				1858	FH-8X-D-7-DPA	7	837	14	8
	Control	1858 D FH				1858	FH-8X-D-14-DPA3	14	805	1	8
	Control	1858 D MF	M	F	L	1858	MF-8X-D	0	752	12	8
	Control	1858 D MF				1858	MF-8X-D-7-DPA	7	757	8	8
	Control	1858 D MF				1858	MF-8X-D-14-DPA	14	753	5	8
	Control	1858 D MM	M	M	L	1858	MM-8X-D	0	855	11	8
	Control	1858 D MM				1858	MM-8X-D-7-DPA	7	842	21	8
	Control	1858 D MM				1858	MM-8X-D-14-DPA	14	846	14	8
IL	LGI	0720-FF-A	F	F	R	0720	FF-8x-A	0	711	10	8
	LGI	0720-FF-A	F	F	R	0720	FF-8x-A-7-DPA	7	761	21	8
	LGI	0720-FF-A	F	F	R	0720	FF-8x-A-21-DPA-(11-36)	21	752	1	8
	LGI	0720-FH-A	F	H	R	0720	FH-8x-A	0	815.981	1	8
	LGI	0720-FH-A	F	H	R	0720	FH-8x-A-7-DPA-(221-228)	7	793.405	2	8
	LGI	0720-FH-A	F	H	R	0720	FH-8x-A-14-DPA-(225-239)	14	887.392	5	8
	LGI	0720-FH-A	F	H	R	0720	FH-8x-A-21-DPA-(30-41)	21	877.398	9	8
	LGI	0720-FH-A	F	H	R	0720	FH-8x-A-28-DPA-(17-30)	28	825.37	6	8
	LGI	0720-MF-A	M	F	L	0720	MF-8x-A-(16)	0	681	1	8
	LGI	0720-MF-A	M	F	L	0720	MF-8x-A-7-DPA-(26-59)	7	720	22	8
	LGI	0720-MF-A	M	F	L	0720	MF-8x-A-14-DPA-(1-25)	14	771	17	8
	LGI	0720-MM-A	M	M	L	0720	MM-8x-A-(38-62)	0	615	5	8
	LGI	0720-MM-A	M	M	L	0720	MM-8x-A-7-DPA-(403-415)	7	634	12	8
	LGI	0720-MM-A	M	M	L	0720	MM-8x-A-14-DPA-(307-311)	14	635	3	8
	LGI	0720-MM-A	M	M	L	0720	MM-8x-A-21-DPA-(174-194)	21	669	11	8
	LGI	0720-MM-A	M	M	L	0720	MM-8x-A-28-DPA-(1-48)	28	764	19	8
	LGI	0720-FM-B	F	M	L	0720	FF-8X-B-(51-67)	0	681	1	8
	LGI	0720-FM-B	F	M	L	0720	FF-8X-B-7-DPA-(108-123)	0	701	1	8
	LGI	0720-FM-B	F	M	L	0720	FM-8X-B-(60-74)	0	1046	3	8
	LGI	0720-FM-B	F	M	L	0720	FM-8X-B-7-DPA-(122-132)	7	1066	10	8
	LGI	0720-FM-B	F	M	L	0720	FM-8x-B-14-DPA-(65-84)	14	1132	7	8
	LGI	0720-FM-B	F	M	L	0720	FM-8x-B-21-DPA-(1-28)	21	1117	15	8
	LGI	0720-MM-B	M	M	R	0720	MM-8x-B-(88)	0	523.381	1	8
	LGI	0720-MM-B	M	M	R	0720	MM-8x-B-7-DPA-(355)	7	541.35	1	8
	LGI	0720-MM-B	M	M	R	0720	MM-8x-B-14-DPA-(225-239)	14	528.373	14	8
	LGI	0720-MM-B	M	M	R	0720	MM-8x-B-21-DPA-(50-64)	21	535.373	6	8
	LGI	0720-MM-B	M	M	R	0720	MM-8x-B-28-DPA-(32-70)	28	530.398	4	8
	LGI	0720-FH-C	F	H	L	0720	FH-8x-C-(32-50)	0	1001	9	8
	LGI	0720-FH-C	F	H	L	0720	FH-8x-C-7-DPA-(60-70)	7	968	7	8
	LGI	0720-FH-C	F	H	L	0720	FH-8x-14-DPA-(20-41)	14	977	1	8
	LGI	0720-MM-C	M	M	L	0720	MM-8x-C-(81)	0	1044.4	1	8
	LGI	0720-MM-C	M	M	L	0720	MM-8x-C-7-DPA2-(366-400)	7	1070.38	1	8
	LGI	0720-MM-C	M	M	L	0720	MM-8x-C-14-DPA-(1-30)	14	1061.4	28	8
	LGI	0720-MM-C	M	M	L	0720	MM-8x-C-21-DPA-(17-30)	21	1074.4	6	8
	LGI	0720-MM-C	M	M	L	0720	MM-8x-C-28-DPA-(330-353)	28	1086.39	7	8
	LGI	0720-FM-D	F	M	R	0720	FM-8x-D-(150-172)	0	922.389	5	8
	LGI	0720-FM-D	F	M	R	0720	FM-8x-D-7-DPA-(66-88)	7	925.345	1	8
	LGI	0720-FM-D	F	M	R	0720	FM-8x-D-14-DPA-(1-36)	14	901.399	8	8
	LGI	0720-FM-D	F	M	R	0720	FM-8x-D-21-DPA-(1-28)	21	907.379	23	8
	LGI	0720-FM-D	F	M	R	0720	FM-8x-D-28-DPA-(113-133)	18	904.337	13	8
	LGI	0720-FF-D	F	F	R	0720	FF-8x-D-(178-193)	0	618	3	8
	LGI	0720-FF-D	F	F	R	0720	FF-8x-D-7-DPA-(67-89)	7	655.347	14	8
	LGI	0720-FF-D	F	F	R	0720	FF-8x-D-14-DPA-(388-408)	14	632.394	13	8
	LGI	0720-FF-D	F	F	R	0720	FF-8x-D-21-DPA-(74-87)	21	655	14	8
	Control	0719-FM-A	F	M	L	0719	FM-8x-A-(70-94)	0	911	1	8
	Control	0719-FM-A	F	M	L	0719	FM-8x-A-7-DPA-(23-42)	7	892		8
	Control	0719-MM-A	M	M	L	0719	MM-8x-A-(84-91)	0	746	1	8
	Control	0719-MM-A	M	M	L	0719	MM-8x-A-7-DPA-(174-193)	7	804	5	8
	Control	0719-MM-A	M	M	L	0719	MM-8x-A-14-DPA-(56-74)	14	762	6	8
	Control	0719-FH-B	F	H	L	0719	FH-8x-B-(1-17)	0	881.392	5	8
	Control	0719-FH-B	F	H	L	0719	FH-8x-B-7-DPA-(84-101)	7	883.375	17	8
	Control	0719-FH-B	F	H	L	0719	FH-8x-B-14-DPA-(103-126)	14	893.373	10	8
	Control	0719-MF-B	M	F	L	0719	MF-8x-B-(32-51)	0	914.38	15	8
	Control	0719-MF-B	M	F	L	0719	MF-8x-B-7-DPA-(26-58)	7	921.161	4	8
	Control	0719-FM-B	F	M	R	0719	FM-8x-B-(70-86)	0	1005.38	4	8
	Control	0719-FM-B	F	M	R	0719	FM-8x-B-7-DPA-(1-22)	7	987.411	7	8
	LGI	0722-FH-A	F	H	L	0722	FH-8x-A-(54-68)	0	673.38	2	8
	LGI	0722-FH-A	F	H	L	0722	FH-8x-A-7-DPA-(85-112)	7	712.366	4	8
	LGI	0722-FH-A	F	H	L	0722	FH-8x-A-14-DPA-(47-55)	14	674.372	2	8
	LGI	0722-FH-A	F	H	L	0722	FH-8x-A-20-DPA	20	686.491	13	8
	LGI	0722-FH-A	F	H	L	0722	FH-8x-A-28-DPA-(1-32)	28	693.377	14	8
	LGI	0722-MM-A	M	M	L	0722	MM-8x-A-(58-85)	0	1041	7	8
	LGI	0722-MM-A	M	M	L	0722	MM-8x-A-7-DPA-(45-70)	7	1070	19	8
	LGI	0722-MM-A	M	M	L	0722	MM-8x-A-14-DPA-(325-360)	14	1060	32	8
	LGI	0722-MM-A	M	M	L	0722	MM-8x-A-20-DPA	14	1065.4	1	8
	LGI	0722-MM-A	M	M	L	0722	MM-8x-A-28-DPA-(469-495)	28	1079	7	8
	LGI	0722-FM-A	F	M	R	0722	FM-8x-A-(1-20)	0	1180	1	8
	LGI	0722-FM-A	F	M	R	0722	FM-8x-A-7-DPA-(71-87)	7	1195.38	7	8
	LGI	0722-FM-A	F	M	R	0722	FM-8x-A-14-DPA-(25-55)	14	1171.4	17	8
	LGI	0722-FM-A	F	M	R	0722	FM-8x-A-20-DPA-(90-128)	20	1182.4	24	8
	LGI	3867 A FF	F	F	L	3867	FF-8X-A	0	732	7	8
	LGI	3867 A FF	F	F	L	3867	FF-8X-A-7-DPA	7	1241	2	8
	LGI	0722-FM-B	F	M	R	0722	FM-8x-B-(20-35)	0	986.392	7	8
	LGI	0722-FM-B	F	M	R	0722	FM-8x-B-7-DPA-(18-35)	7	1006.4	5	8
	LGI	0722-FM-B	F	M	R	0722	FM-8x-B-14-DPA-(300-330)	14	977.039	28	8
	LGI	0722-FM-B	F	M	R	0722	FM-8x-B-20-DPA-(158-189)	20	989.386	1	8
	LGI	0722-MF-B	M	F	L	0722	MF-8x-B-(50-80)	0	889.373	17	8
	LGI	0722-MF-B	M	F	L	0722	MF-8x-B-7-DPA-(86-113)	7	890.403	15	8
	LGI	0722-MF-B	M	F	L	0722	MF-8x-B-14-DPA-(128-155)	14	899.395	22	8
	LGI	0722-MM-B	M	M	L	0722	MM-8x-B-(24-45)	0	601	19	8
	LGI	0722-MM-B	M	M	L	0722	MM-8x-B-7-DPA-(20-40)	7	609	11	8
	LGI	0722-MM-B	M	M	L	0722	MM-8x-B-14-DPA-(194-207)	14	594	7	8
	LGI	0722-MM-B	M	M	L	0722	MM-8x-B-20-DPA	20	592	5	8
	LGI	0722-FH-B	F	H	L	0722	FH-8x-B(185-202)	0	1158	5	8
	LGI	0722-FH-B	F	H	L	0722	FH-8x-B-7-DPA	7	1164	28	8
	LGI	0722-FF-C	F	F	L	0722	FF-8x-C-(48-68)	0	757.343	3	8
	LGI	0722-FF-C	F	F	L	0722	FF-8x-C-7-DPA-(1-14)	7	760.37	13	8
	LGI	0722-MH-C	M	H	L	0722	MH-8x-C-(1-41)	0	913.37	1	8
	LGI	0722-MH-C	M	H	L	0722	MH-8x-C-7-DPA-(91-109)	7	900.392	2	8
	LGI	0722-MM-C	M	M	L	0722	MM-8x-C-(29-47)	0	655.347	5	8
	LGI	0722-MM-C	M	M	L	0722	MM-8x-C-7-DPA-(140-160)	7	653.391	19	8
	LGI	0722-FM-C	F	M	L	0722	FM-8x-C-(99-123)	0	1090.41	12	8
	LGI	0722-FM-C	F	M	L	0722	FM-8x-C-7-DPA-(200-236)	7	1164.39	7	8
	LGI	0722-FF-D	F	F	R	0722	FF-8x-D-(283)	0	490.398	1	8
	LGI	0722-FF-D	F	F	R	0722	FF-8x-D-7-DPA	7	506.385	6	8
	LGI	0722-FF-D	F	F	R	0722	FF-8x-D-14-DPA-(23-40)	14	496.397	14	8
	LGI	0722-FF-D	F	F	R	0722	FF-8x-D-20-DPA2	20	508.356	1	8
	LGI	0722-FH-D	F	H	L	0722	FH-8x-D-(90-113)	0	1051.36	7	8
	LGI	0722-FH-D	F	H	L	0722	FH-8x-D-7-DPA-(44-66)	7	1077.39	9	8
	LGI	0722-FM-D	F	M	L	0722	FM-8x-D-(416-420)	0	1064	4	8
	LGI	0722-FM-D	F	M	L	0722	FM-8x-D-7-DPA-(160-178)	7	1080	14	8
	LGI	0722-FM-D	F	M	L	0722	FM-8x-D-14-DPA-(50)	14	1087	1	8
	LGI	0722-FM-D	F	M	L	0722	FM-8x-D-20-DPA-(109-128)	20	1092	4	8
	LGI	0722-FM-D	F	M	L	0722	FM-8x-D-28-DPA-(120-145)	28	1106	14	8
	LGI	0722-MM-D	M	M	L	0722	MM-8x-D-(27-57)	0	950	12	8
	LGI	0722-MM-D	M	M	L	0722	MM-8x-D-7-DPA-(227-240)	7	1018	13	8
	LGI	0722-MM-D	M	M	L	0722	MM-8x-D-14-DPA-(368-388)	14	1022	20	8
	LGI	0722-MM-D	M	M	L	0722	MM-8x-D-28-DPA2-(128-145)	28	1030	11	8
ZC	LGI	Alpha-MFR	M	F	R	ZC	Alpha-MFR-aftercut	0	223	1	2.5
	LGI	Alpha-MFR				ZC	Alpha-MFR-2WA	14	214	1	2.5
	LGI	Beta-FBR	F	H	R	ZC	Beta-FBR-aftercut	0	136	1	2.5
	LGI	Beta-FBR				ZC	Beta-FBR-2WA	14	141	1	2.5
	LGI	Beta-MBR	M	H	R	ZC	Beta-MBR-aftercut	0	286	1	2.5
	LGI	Beta-MBR				ZC	Beta-MBR-2WA(Dead)	14	381	1	2.5
	LGI	Beta-FMR	F	M	R	ZC	Beta-FMR-aftercut	1	221	1	2.5
	LGI	Beta-FMR				ZC	Beta-FMR-2WA	14	254	1	2.5
	LGI	Delta-FBL	F	H	L	ZC	Delta-FBL-aftercut	0	314	1	2.5
	LGI	Delta-FBL				ZC	Delta-FBL-2WA	14	321	1	2.5
	LGI	Epsilon-FBL	F	H	L	ZC	Epsilon-FBL-aftercut	0	275	1	2.5
	LGI	Epsilon-FBL				ZC	Epsilon-FBL-2WA	14	369	1	2.5
	LGI	Delta-MML	M	M	L	ZC	Delta-MML-aftercut	0	201	1	2.5
	LGI	Delta-MML				ZC	Delta-MML-2WA	14	214	1	2.5
	LGI	Epsilon-FBR	F	H	R	ZC	Epsilon-FBR-aftercut	0	252	1	2.5
	LGI	Epsilon-FBR				ZC	Epsilon-FBR-2WA	14	315	1	2.5
	LGI	Epsilon-FFR	F	F	R	ZC	Epsilon-FFR-aftercut	0	253	1	2.5
	LGI	Epsilon-FFR				ZC	Epsilon-FFR-2WA	14	240	1	2.5
	LGI	Zeta-FBL	F	H	L	ZC	Zeta-FBL-aftercut	0	271	1	2.5
	LGI	Zeta-FBL				ZC	Zeta-FBL-2WA	14	280	1	2.5
	LGI	Zeta-FFR	F	F	R	ZC	Zeta-FFR-aftercut	0	168	1	2.5
	LGI	Zeta-FFR				ZC	Zeta-FFR-2WA	14	208	1	2.5
	LGI	Eta-FFR	F	F	R	ZC	Eta-FFR-aftercut	0	152	1	2.5
	LGI	Eta-FFR				ZC	Eta-FFR-2WA	14	179	1	2.5
	LGI	Eta-FFL	F	F	L	ZC	Eta-FFL-aftercut	0	224	1	2.5
	LGI	Eta-FFL				ZC	Eta-FFL-2WA	14	242	1	2.5
	LGI	Theta-FBL	F	H	L	ZC	Theta-FBL-aftercut	0	240	1	2.5
	LGI	Theta-FBL				ZC	Theta-FBL-2WA	14	238	1	2.5
	LGI	Theta-FFR	F	F	R	ZC	Theta-FFR-aftercut	0	324	1	2.5
	LGI	Theta-FFR				ZC	Theta-FFR-2WA	14	315	1	2.5
	LGI	Theta-FMR	F	M	R	ZC	Theta-FMR-aftercut	0	202	1	2.5
	LGI	Theta-FMR				ZC	Theta-FMR-2WA	14	271	1	2.5
	LGI	Kappa-FFR	F	F	R	ZC	Kappa-FFR-aftercut	0	225	1	2.5
	LGI	Kappa-FFR				ZC	Kappa-FFR-2WA	14	246	1	2.5
	LGI	Lamda-MBL	M	H	L	ZC	Lamda-MBL-aftercut	0	158	1	2.5
	LGI	Lamda-MBL				ZC	Lamda-MBL-2WA	14	178	1	2.5
	LGI	Lamda-MFR	M	F	R	ZC	Lamda-MFR-aftercut	0	218	1	2.5
	LGI	Lamda-MFR				ZC	Lamda-MFR-2WA	14	238	1	2.5
	LGI	Mu-FFR	F	F	R	ZC	Mu-FFR-aftercut	0	192	1	2.5
	LGI	Mu-FFR				ZC	Mu-FFR-2WA	14	196	1	2.5
	LGI	Nu-MBR	M	H	R	ZC	Nu-MBR-aftercut	0	245	1	2.5
	LGI	Nu-MBR				ZC	Nu-MBR-2WA	14	240	1	2.5
	LGI	Nu-FBL	F	H	L	ZC	Nu-FBL-aftercut	0	248	1	2.5
	LGI	Nu-FBL				ZC	Nu-FBL-2WA	14	263	1	2.5
	LGI	Xi-MML	M	M	L	ZC	Xi-MML-aftercut	0	98	1	2.5
	LGI	Xi-MML				ZC	Xi-MML-2WA	14	99	1	2.5
	LGI	Xi-MBR	M	H	R	ZC	Xi-MBR-aftercut	0	305	1	2.5
	LGI	Xi-MBR				ZC	Xi-MBR-2WA	14	314	1	2.5
	LGI	Omicron-MML	M	M	L	ZC	Omicron-MML-aftercut	0	245	1	2.5
	LGI	Omicron-MML				ZC	Omicron-MML-2WA	14	244	1	2.5
	LGI	Pi-FFR	F	F	R	ZC	Pi-FFR-aftercut	0	215	1	2.5
	LGI	Pi-FFR				ZC	Pi-FFR-2WA	14	226	1	2.5
LG - YL	LGI	0629 A FH	F	H	R	0629	A FH - 0 DPA 2	0	189	8	3.2
	LGI	0629 A FH	F	H	R	0629	A FH - 8 DPA	8	509	17	8
	LGI	0629 A FH	F	H	R	0629	A FH - 21 DPA	21	528	1	8
	LGI	0629 A FM	F	M	L	0629	A FM - 0 DPA 2	0	129	7	3.2
	LGI	0629 A FM	F	M	L	0629	A FM - 8 DPA	8	162	2	3.2
	LGI	0629 A MH	M	H	L	0629	A MH - 0 DPA 2	0	130	6	3.2
	LGI	0629 A MH	M	H	L	0629	A MH - 8 DPA	8	126	1	3.2
	LGI	0629 A MH	M	H	L	0629	A MH - 8 DPA	8	322	15	8
	LGI	0629 A MH	M	H	L	0629	A MH - 21 DPA	21	351	8	8
	LGI	0629 A MH	M	H	L	0629	A MH - 21 DPA	21	137	13	3.2
	LGI	0629 B FH	F	H	R	0629	B FH - 0 DPA 2	0	96	5	3.2
	LGI	0629 B FH	F	H	R	0629	B FH - 21 DPA	21	236	2	8
	LGI	0629 B FM	F	M	L	0629	B FM - 0 DPA 2	0	133	3	3.2
	LGI	0629 B FM	F	M	L	0629	B FM - 8 DPA	8	331	6	8
	LGI	0629 B FM	F	M	L	0629	B FM - 27 DPA	27	337	6	8
	LGI	0629 C FH	F	H	R	0629	C FH - 0 DPA	0	139	4	3.2
	LGI	0629 C FH	F	H	R	0629	C FH - 0 DPA 2	0	131	1	3.2
	LGI	0629 C FH	F	H	R	0629	C FH - 8 DPA	8	386	10	8
	LGI	0629 C FH	F	H	R	0629	C FH - 8 DPA	8	148	1	3.2
	LGI	0629 C FM	F	M	L	0629	C FM - 0 DPA	0	118	4	3.2
	LGI	0629 C FM	F	M	L	0629	C FM - 8 DPA	8	115	6	3.2
	LGI	0629 C FM	F	M	L	0629	C FM - 21 DPA 2	21	446	15	8
	LGI	0629 D FH	F	H	L	0629	D FH - 0 DPA - into the femur	0	456	1	3.2
	LGI	0629 D FH	F	H	L	0629	D FH - 8 DPA	8	1355	12	8
	LGI	0629 D FH	F	H	L	0629	D FH - 21 DPA AND X	21	1524	1	8
	LGI	0629 E FF	F	F	L	0629	E FF - 0 DPA	0	109	5	3.2
	LGI	0629 E FF	F	F	L	0629	E FF - 8 DPA	8	239	11	8
	LGI	0629 E FF	F	F	L	0629	E FF - 21 DPA	21	269	4	8
LG - YL	LGI	0630 A FH	F	H	L	0630	A FH - 0 DPA	0	484	15	3.2
	LGI	0630 A FH	F	H	L	0630	A FH - 0 DPA 2	0	522	3	3.2
	LGI	0630 A FH	F	H	L	0630	A FH - 16 DPA	16	1244	6	8
	LGI	0630 A FH	F	H	L	0630	A FH - 28 DPA	28	530	14	3.2
	LGI	0630 A FM	F	M	L	0630	A FM - 0 DPA 2	0	174	6	3.2
	LGI	0630 A FM	F	M	L	0630	A FM - 16 DPA	16	450	3	8
	LGI	0630 B MM	M	M	R	0630	B MM - 0 DPA	0	140	6	3.2
	LGI	0630 B MM	M	M	R	0630	B MM 8X - 0 DPA	0	336	11	8
	LGI	0630 B MM	M	M	R	0630	B MM - 16 DPA	16	396	2	8
	LGI	0630 B MM	M	M	R	0630	B MM - 29 DPA	29	345	3	8
	LGI	0630 B MM	M	M	R	0630	B MM - 29 DPA 2	29	357	1	8
	LGI	0630 C FF	F	F	L	0630	C FF - 0 DPA	0	369	6	3.2
	LGI	0630 C FF	F	F	L	0630	C FF - 16 DPA	16	942	2	8
	LGI	0630 C FF	F	F	L	0630	C FF - 29 DPA	29	949	11	8
	LGI	0630 C FH	F	H	L	0630	C FH - 0 DPA 2	0	800	18	8
	LGI	0630 C FH	F	H	L	0630	C FH - 0 DPA 3	0	312	6	3.2
	LGI	0630 C FH	F	H	L	0630	C FH - 16 DPA	16	829	1	8
	LGI	0630 C FH	F	H	L	0630	C FH - 29 DPA 2	29	877	14	8
	LGI	0630 C FH	F	H	L	0630	C FH - 29 DPA X	29	844	14	8
	LGI	0630 C FM	F	M	L	0630	C FM - 0 DPA	0	456	8	3.2
	LGI	0630 C FM	F	M	L	0630	C FM - 16 DPA	16	1135	4	8
	LGI	0630 C FM	F	M	L	0630	C FM - 29 DPA	29	1128	1	8
	LGI	0630 C FM	F	M	L	0630	C FM - 29 DPA 2	29	1143	1	8
	LGI	0630 E MH	M	H	R	0630	E MH - 0 DPA 3	0	294	8	8
	LGI	0630 E MH	M	H	R	0630	E MH - 0 DPA 4	0	124	1	3.2
	LGI	0630 E MH	M	H	R	0630	E MH - 16 DPA	16	287	2	8
	LGI	0630 E MH	M	H	R	0630	E MH - 29 DPA	29	302	8	8
	LGI	0630 E MM	M	M	R	0630	E MM - 0 DPA	0	517	8	8
	LGI	0630 E MM	M	M	R	0630	E MM - 0 DPA 2	0	221	6	3.2
	LGI	0630 E MM	M	M	R	0630	E MM - 16 DPA	16	556	1	8
	LGI	0630 E MM	M	M	R	0630	E MM - 16 DPA 2	16	215	12	3.2
	LGI	0630 E MM	M	M	R	0630	E MM - 29 DPA	29	518	3	8
	LGI	0630 E MM	M	M	R	0630	E MM - 29 DPA 3	29	544	2	8
LG - YL	LGI	0706 A FM	F	M	R	0706	A FM - 3 DPA	3	747	7	8
	LGI	0706 A FM	F	M	R	0706	A FM - 17 DPA	17	291	1	4
	LGI	0706 A MM	M	M	R	0706	A MM - 3 DPA	3	565	11	8
	LGI	0706 A MM	M	M	R	0706	A MM - 17 DPA	17	621	3	8
	LGI	0706 B FM	F	M	R	0706	B FM - 3 DPA	3	607	9	8
	LGI	0706 B FM	F	M	R	0706	B FM - 17 DPA	17	657	1	8
	LGI	0706 B MH	M	H	L	0706	B MH - 3 DPA	3	1211	10	8
	LGI	0706 B MH	M	H	L	0706	B MH - 17 DPA	17	1249	4	8
	LGI	0706 B MH	M	H	L	0706	B MH - 17 DPA 2	17	1218	4	8
	LGI	0706 B MH	M	H	L	0706	B MH - 32 DPA	32	1267	1	8
	LGI	0706 B MM	M	M	L	0706	B MM - 3 DPA 2	3	748	1	8
	LGI	0706 B MM	M	M	L	0706	B MM - 17 DPA	17	748	5	8
	LGI	0706 B MM	M	M	L	0706	B MM - 32 DPA	32	811	10	8
	LGI	0706 C FH	F	H	R	0706	C FH - 3 DPA	3	630	11	8
	LGI	0706 C FH	F	H	R	0706	C FH - 17 DPA	17	728	7	8
	LGI	0706 C FH	F	H	R	0706	C FH - 17 DPA 2	17	723	6	8
	LGI	0706 C FM	F	M	R	0706	C FM - 3 DPA	3	523	21	8
	LGI	0706 C FM	F	M	R	0706	C FM - 17 DPA 2	17	519	1	8
	LGI	0706 C FM	F	M	R	0706	C FM - 32 DPA	32	517	8	8
	LGI	0706 C FM	F	M	R	0706	C FM - 32 DPA 2	32	520	1	8
	LGI	0706 C MF	M	F	L	0706	C MF - 3 DPA	3	575	17	8
	LGI	0706 C MF	M	F	L	0706	C MF - 17 DPA	17	544	3	8
	LGI	0706 C MF	M	F	L	0706	C MF - 32 DPA	32	555	5	8
	LGI	0706 C MM	M	M	L	0706	C MM - 3 DPA	3	264	1	8
	LGI	0706 C MM	M	M	L	0706	C MM - 17 DPA	17	265	9	8
	LGI	0706 C MM	M	M	L	0706	C MM - 32 DPA	32	266	4	8
	LGI	0706 C MM	M	M	L	0706	C MM - 32 DPA X 2	32	266	3	8
	LGI	0706 D FF	F	F	L	0706	D FF - 3 DPA 2	3	538	12	8
	LGI	0706 D FF	F	F	L	0706	D FF - 17 DPA 2	17	549	3	8
	LGI	0706 D FF	F	F	L	0706	D FF - 32 DPA	32	690	1	8
	LGI	0706 D FM	F	M	R	0706	D FM - 3 DPA	3	642	1	8
	LGI	0706 D FM	F	M	R	0706	D FM - 17 DPA	17	645	9	8
	LGI	0706 D FM	F	M	R	0706	D FM - 17 DPA 2	17	674	1	8
	LGI	0706 D FM	F	M	R	0706	D FM - 32 DPA	32	646	6	8
	LGI	0706 D MF	M	F	L	0706	D MF - 3 DPA	3	657	1	8
	LGI	0706 D MF	M	F	L	0706	D MF - 17 DPA 2	17	646	1	8
	LGI	0706 D MF	M	F	L	0706	D MF - 17 DPA 3	17	677	8	8
	LGI	0706 D MH	M	H	R	0706	D MH - 3 DPA	3	1039	7	8
	LGI	0706 D MH	M	H	R	0706	D MH - 17 DPA	17	1219	6	8
	LGI	0706 D MH	M	H	R	0706	D MH - 17 DPA 3	17	1200	5	8
	LGI	0706 D MH	M	H	R	0706	D MH - 17 DPA 4	17	1217	13	8
	LGI	0706 D MM	M	M	L	0706	D MM - 3 DPA	3	745	1	8
	LGI	0706 D MM	M	M	L	0706	D MM - 3 DPA 2	3	807	5	8
	LGI	0706 D MM	M	M	L	0706	D MM - 17 DPA	17	787	4	8
	LGI	0706 D MM	M	M	L	0706	D MM - 17 DPA 2	17	775	1	8
	LGI	0706 D MM	M	M	L	0706	D MM - 17 DPA 3	17	377	1	4
	LGI	0708 A FH	F	H	L	0708	A FH - 0 DPA 3	0	648	15	8
	LGI	0708 A FH	F	H	L	0708	A FH - 15 DPA	15	708	8	8
	LGI	0708 A FH	F	H	L	0708	A FH - 32 DPA	32	698	1	8
	LGI	0708 B FF	F	F	R	0708	B FF - 0 DPA	0	643	13	8
	LGI	0708 B FF	F	F	R	0708	B FF - 17 DPA	17	643	9	8
	LGI	0708 B FF	F	F	R	0708	B FF - 17 DPA 2	17	636	7	8
	LGI	0708 B MH	M	H	L	0708	B MH - 0 DPA	0	845	12	8
	LGI	0708 B MH	M	H	L	0708	B MH - 17 DPA	17	909	8	8
	LGI	0708 B MH	M	H	L	0708	B MH - 17 DPA 2	17	899	2	8
	LGI	0708 B MH	M	H	L	0708	B MH - 32 DPA	32	850	11	8
	LGI	0708 C FF	F	F	L	0708	C FF - 0 DPA 2	0	705	3	8
	LGI	0708 C FF	F	F	L	0708	C FF - 19 DPA	19	704	4	8
	LGI	0708 C FH	F	H	L	0708	C FH - 0 DPA	0	1007	12	8
	LGI	0708 C FH	F	H	L	0708	C FH - 19 DPA	19	1006	1	8
	LGI	0708 C FM	F	M	L	0708	C FM - 0 DPA	0	649	10	8
	LGI	0708 C FM	F	M	L	0708	C FM - 19 DPA	19	636	6	8
	LGI	0708 C MM	M	M	L	0708	C MM - 0 DPA	0	233	1	8
	LGI	0708 C MM	M	M	L	0708	C MM - 19 DPA	19	240	6	8
	LGI	0708 C MM	M	M	L	0708	C MM - 32 DPA	32	235	3	8
	LGI	0708 D FH	F	H	L	0708	D FH - 0 DPA	0	636	5	8
	LGI	0708 D FH	F	H	L	0708	D FH - 19 DPA	19	659	10	8
	LGI	0708 D FH	F	H	L	0708	D FH - 19 DPA X	19	668	2	8
	LGI	0708 D FM	F	M	R	0708	D FM - 0 DPA 2	0	420	5	8
	LGI	0708 D FM	F	M	R	0708	D FM - 19 DPA	19	416	5	8
	LGI	0708 D MM	M	M	L	0708	D MM - 0 DPA	0	800	3	8
	LGI	0708 D MM	M	M	L	0708	D MM - 19 DPA	19	800	5	8
	LGI	0708 D MM	M	M	L	0708	D MM - 32 DPA	32	794	6	8
	LGI	0708 D MM	M	M	L	0708	D MM - 32 DPA 2	32	763	7	8
	LGI	0708 E FF	F	F	L	0708	E FF - 0 DPA 2	0	959	6	8
	LGI	0708 E FF	F	F	L	0708	E FF - 19 DPA	19	1007	6	8
	LGI	0708 E FF	F	F	L	0708	E FF - 32 DPA	32	1012	5	8
	LGI	0708 E FF	F	F	L	0708	E FF - 32 DPA 2	32	1039	8	8
	LGI	0708 E MM	M	M	R	0708	E MM - 0 DPA 2	0	250	9	3.2
	LGI	0708 E MM	M	M	R	0708	E MM - 0 DPA 3	0	705	5	8
	LGI	0708 E MM	M	M	R	0708	E MM - 19 DPA	19	686	2	8
LG-YL	LGI	0709 A FF	F	F	R	0709	A FF - 0 DPA	0	862	17	8
	LGI	0709 A FF	F	F	R	0709	A FF - 18 DPA	18	902	2	8
	LGI	0709 A FF	F	F	R	0709	A FF - 18 DPA 2	18	863	14	8
	LGI	0709 A FH	F	H	L	0709	A FH - 0 DPA	0	1074	9	8
	LGI	0709 A FH	F	H	L	0709	A FH - 18 DPA	18	1090	1	8
	LGI	0709 A FM	F	M	R	0709	A FM - 0 DPA 2	0	1124	16	8
	LGI	0709 A FM	F	M	R	0709	A FM - 18 DPA	18	1119	2	8
	LGI	0709 A FM	F	M	R	0709	A FM - 30 DPA	30	1097	9	8
	LGI	0709 A FM	F	M	R	0709	A FM - 30 DPA 4	30	1097	2	8
	LGI	0709 A MM	M	M	L	0709	A MM - 0 DPA 2	0	438	4	8
	LGI	0709 A MM	M	M	L	0709	A MM - 30 DPA	30	479	2	8
	LGI	0709 A MM	M	M	L	0709	A MM - 30 DPA 2	30	451	1	8
	LGI	0709 B FM	F	M	R	0709	B FM - 0 DPA	0	386	3	3.2
	LGI	0709 B FM	F	M	R	0709	B FM - 0 DPA 2	0	969	8	8
	LGI	0709 B FM	F	M	R	0709	B FM - 18 DPA	18	995	6	8
	LGI	0709 B FM	F	M	R	0709	B FM - 30 DPA	30	497	2	4
	LGI	0709 B FM	F	M	R	0709	B FM - 30 DPA 2	30	999	1	8
	LGI	0709 B MF	M	F	L	0709	B MF - 0 DPA	0	248	3	8
	LGI	0709 B MF	M	F	L	0709	B MF - 18 DPA	18	249	4	8
	LGI	0709 B MM	M	M	L	0709	B MM - 0 DPA	0	1005	5	8
	LGI	0709 B MM	M	M	L	0709	B MM - 0 DPA	0	412	1	3.2
	LGI	0709 B MM	M	M	L	0709	B MM - 18 DPA	18	1067	1	8
	LGI	0709 B MM	M	M	L	0709	B MM - 18 DPA 2	18	1111	8	8
	LGI	0709 B MM	M	M	L	0709	B MM - 18 DPA 2	18	548	5	4
	LGI	0709 B MM	M	M	L	0709	B MM - 30 DPA 2	30	1205	9	8
	LGI	0709 B MM	M	M	L	0709	B MM - 30 DPA 4	30	681	11	4
	LGI	0709 C MF	M	F	L	0709	C MF - 0 DPA	0	906	9	8
	LGI	0709 C MF	M	F	L	0709	C MF - 0 DPA 2	0	934	15	8
	LGI	0709 C MF	M	F	L	0709	C MF - 18 DPA	18	899	1	8
	LGI	0709 C MF	M	F	L	0709	C MF - 18 DPA 2	18	904	1	8
	LGI	0709 C MM	M	M	R	0709	C MM - 0 DPA 2	0	1060	16	8
	LGI	0709 C MM	M	M	R	0709	C MM - 18 DPA	18	1053	6	8
	LGI	0709 C MM	M	M	R	0709	C MM - 30 DPA	30	1058	3	8
	LGI	0709 D MM	M	M	R	0709	D MM - 0 DPA 2	0	1184	6	8
	LGI	0709 D MM	M	M	R	0709	D MM - 18 DPA	18	1208	4	8
	LGI	0709 E MH	M	H	L	0709	E MH - 0 DPA	0	898	7	8
	LGI	0709 E MH	M	H	L	0709	E MH - 18 DPA	18	893	6	8
	LGI	0709 E MM	M	M	R	0709	E MM - 0 DPA	0	238	1	8
	LGI	0709 E MM	M	M	R	0709	E MM - 18 DPA	18	244	8	8
	LGI	0709 E MM	M	M	R	0709	E MM - 30 DPA	30	243	10	8
	LGI	0630 B FF	F	F	L	0630	B FF 8X - 0 DPA	0	171	8	8
	LGI	0630 B FF	F	F	L	0630	B FF - 16 DPA	16	161	8	8
	LGI	0630 B FF	F	F	L	0630	B FF - 29 DPA	29	171	4, 8	8
	LGI	0708 D MH	M	H	R	0708	D MH - 0 DPA 2	0	632	3.2, 8	8
	LGI	0708 D MH	M	H	R	0708	D MH - 19 DPA	19	629	4, 8	8
	LGI	0708 D MH	M	H	R	0708	D MH - 32 DPA	32	632	4, 8	8
LG-YL	Control	0730 A FM	F	M	R	0730	A FM - 0 DPA	0	1007	5	8
	Control	0730 A FM	F	M	R	0730	A FM - 14 DPA	14	993	3	8
	Control	0730 A FM	F	M	R	0730	A FM - 14 DPA 2	14	405	1	3.2
	Control	0730 A FM	F	M	R	0730	A FM - 21 DPA 2	21	493	1	4
	Control	0730 A FM	F	M	R	0730	A FM - 21 DPA 3	21	992	7	8
	Control	0730 A MF	M	F	L	0730	A MF - 0 DPA	0	1010	5	8
	Control	0730 A MF	M	F	L	0730	A MF - 14 DPA	14	993	14	8
	Control	0730 A MH	M	H	R	0730	A MH - 0 DPA	0	728	16	8
	Control	0730 A MH	M	H	R	0730	A MH - 14 DPA	14	749	10	8
	Control	0730 A MH	M	H	R	0730	A MH - 14 DPA 2	14	302	2	3.2
	Control	0730 A MH	M	H	R	0730	A MH - 21 DPA 2	21	350	1	4
	Control	0730 A MM	M	M	L	0730	A MM - 0 DPA	0	761	4	8
	Control	0730 A MM	M	M	L	0730	A MM - 14 DPA	14	756	1	8
	Control	0730 A MM	M	M	L	0730	A MM - 14 DPA	14	311	12	3.2
	Control	0730 A MM	M	M	L	0730	A MM - 21 DPA	21	758	2	8
	Control	0730 B FF	F	F	L	0730	B FF - 0 DPA	0	1018	4	8
	Control	0730 B FF	F	F	L	0730	B FF - 14 DPA	14	1010	11	8
	Control	0730 B FF	F	F	L	0730	B FF - 21 DPA	21	981	1	8
	Control	0730 B FM	F	M	R	0730	B FM - 0 DPA	0	1013	10	8
	Control	0730 B FM	F	M	R	0730	B FM - 14 DPA	14	996	11	8
	Control	0730 B FM	F	M	R	0730	B FM - 21 DPA	21	1003	1	8
	Control	0730 C FM	F	M	L	0730	C FM - 0 DPA	0	693	1	8
	Control	0730 C FM	F	M	L	0730	C FM - 14 DPA 2	14	698	1	8
	Control	0730 C FM	F	M	L	0730	C FM - 21 DPA	21	706	1	8
	Control	0730 C MM	M	M	R	0730	C MM - 0 DPA	0	969	5	8
	Control	0730 C MM	M	M	R	0730	C MM - 14 DPA 2	14	354	1	3.2
	Control	0730 C MM	M	M	R	0730	C MM - 21 DPA	21	946	7	8
	Control	0730 D FM	F	M	L	0730	D FM - 0 DPA	0	782	1	8
	Control	0730 D FM	F	M	L	0730	D FM - 14 DPA 2	14	309	1	3.2
	Control	0730 D FM	F	M	L	0730	D FM - 21 DPA	21	780	1	8
	Control	0730 D MM	M	M	R	0730	D MM - 0 DPA	0	755	4	8
	Control	0730 D MM	M	M	R	0730	D MM - 14 DPA	14	763	4	8
	Control	0730 D MM	M	M	R	0730	D MM - 14 DPA 2	14	295	8	3.2
	Control	0730 E FH	F	H	R	0730	E FH - 0 DPA	0	1224	15	8
	Control	0730 E FH	F	H	R	0730	E FH - 14 DPA 2	14	1222	7	8
	Control	0730 E FH	F	H	R	0730	E FH - 21 DPA	21	1218	6	8
	Control	0730 E FM	F	M	R	0730	E FM - 0 DPA	0	1014	2	8
	Control	0730 E FM	F	M	R	0730	E FM - 14 DPA	14	972	12	8
	Control	0730 E MM	M	M	L	0730	E MM - 0 DPA	0	1147	6	8
	Control	0730 E MM	M	M	L	0730	E MM - 14 DPA	14	1133	12	8
	Control	0730 E MM	M	M	L	0730	E MM - 21 DPA	21	1121	7	8
	Control	0802 B MM	M	M	L	0802	B MM - 0 DPA	0	295	4	2.5
	Control	0802 B MM	M	M	L	0802	B MM - 22 DPA	22	462	16	4
	Control	0802 B FH	F	H	R	0802	B FH - 0 DPA	0	294	12	2.5
	Control	0802 B FH	F	H	R	0802	B FH - 14 DPA	14	919	1	8
	Control	0802 B FH	F	H	R	0802	B FH - 22 DPA	22	941	5	8
	Control	0802 B MF	M	F	L	0802	B MF - 0 DPA	0	227	4	2.5
	Control	0802 B MF	M	F	L	0802	B MF - 14 DPA	14	708	1	8
	Control	0802 C FF	F	F	L	0802	C FF - 0 DPA	0	1042	1	8
	Control	0802 C FF	F	F	L	0802	C FF - 14 DPA	14	1070	4	8
	Control	0802 C FF	F	F	L	0802	C FF - 22 DPA	22	1049	17	8
	Control	0802 C FH	F	H	L	0802	C FH - 0 DPA	0	1008	4	8
	Control	0802 C FH	F	H	L	0802	C FH - 14 DPA	14	1015	1	8
	Control	0802 C MM	M	M	L	0802	C MM - 0 DPA	0	923	5	8
	Control	0802 C MM	M	M	L	0802	C MM - 22 DPA	22	916	7	8
IL-YL	Control	0806 A FH	F	H	R	0806	A FH - 0 DPA	0	1090	3	8
	Control	0806 A FH	F	H	R	0806	A FH - 21 DPA	21	1062	8	8
	Control	0806 A MM	M	M	R	0806	A MM - 0 DPA 2	0	770	3	8
	Control	0806 A MM	M	M	R	0806	A MM - 21 DPA	21	762	6	8
	Control	0806 B MH	M	H	R	0806	B MH - 0 DPA	0	992	2	8
	Control	0806 B MH	M	H	R	0806	B MH - 21 DPA	21	1002	1	8
	Control	0806 B MM	M	M	L	0806	B MM - 0 DPA	0	253	9	2.5
	Control	0806 B MM	M	M	L	0806	B MM - 21 DPA	21	798	1	8
YL	Control	0829 A FF	F	F	L	0829	A-FF-8X-0-DPA	0	796	1	8
	Control	0829 A FF	F	F	L	0829	A-FF-8X-21-DPA-XS	21	778	1	8
	Control	0829 A FM	F	M	R	0829	A-FM-8X-0-DPA	0	820	3	8
	Control	0829 A FM	F	M	R	0829	A-FM-8X-21-DPA	21	824	6	8
	Control	0829 A MH	M	H	L	0829	A-MH-8X-0-DPA	0	801		8
	Control	0829 A MH	M	H	L	0829	A-MH-8X-14-DPA	14	803	4	8
	Control	0829 A MH	M	H	L	0829	A-MH-8X-21-DPA	21	802	7	8
	Control	0829 B FF	F	F	R	0829	B-FF-8X-0-DPA	0	487	1	8
	Control	0829 B FF	F	F	R	0829	B-FF-8X-14-DPA	14	480	1	8
	Control	0829 B FF	F	F	R	0829	B-FF-8X-14-DPA2	14	484	1	8
	Control	0829 B FF	F	F	R	0829	B-FF-8X-21-DPA	21	476	1	8
	Control	0829 B MF	M	F	L	0829	B-MF-8X-0-DPA	0	782	10	8
	Control	0829 B MF	M	F	L	0829	B-MF-8X-14-DPA	14	773	7	8
	Control	0829 B MF	M	F	L	0829	B-MF-8X-21-DPA	21	762	2	8
	Control	0829 B MH	M	H	L	0829	B-MH-8X-0-DPA	0	726	1	8
	Control	0829 B MH	M	H	L	0829	B-MH-8X-14-DPA	14	729	9	8
	Control	0829 B MH	M	H	L	0829	B-MH-8X-21-DPA	21	721	1	8
	Control	0829 C MF	M	F	R	0829	C-MF-8X-0-DPA	0	849	1	8
	Control	0829 C MF	M	F	R	0829	C-MF-8X-14-DPA	14	850	11	8
	Control	0829 C MF	M	F	R	0829	C-MF-8X-21-DPA	21	855	1	8
	Control	0829 C MM	M	M	R	0829	C-MM-8X-0-DPA	0	1111	2	8
	Control	0829 C MM	M	M	R	0829	C-MM-8X-14-DPA	14	1118	1	8
	Control	0829 C MM	M	M	R	0829	C-MM-8X-21-DPA	21	1116	6	8
	Control	0829 D FF	F	F	L	0829	D-FF-8X-0-DPA	0	532	4	8
	Control	0829 D FF	F	F	L	0829	D-FF-8X-14-DPA	14	534	1	8
	Control	0829 D FF	F	F	L	0829	D-FF-8X-21-DPA	21	551	6	8
	Control	0829 E FH	F	H	L	0829	E-FH-8X-0-DPA	0	816	3	8
	Control	0829 E FH	F	H	L	0829	E-FH-8X-14-DPA2	14	816	2	8
	Control	0829 E FH	F	H	L	0829	E-FH-8X-21-DPA	21	797	2	8
	Control	0829 E MM	M	M	L	0829	E-MM-8X-0-DPA	0	845	3	8
	Control	0829 E MM	M	M	L	0829	E-MM-8X-21-DPA	21	856	1	8
	Control	0829 F FH	F	H	L	0829	F-FH-8X-0-DPA	0	1218	5	8
	Control	0829 F FH	F	H	L	0829	F-FH-8X-14-DPA	14	1244	1	8
	Control	0829 F FH	F	H	L	0829	F-FH-8X-21-DPA	21	1261	9	8
	Control	0829 F FH	F	H	L	0829	F-FH-8X-21-DPA-2	21	1237	1	8
	Control	0829 F MF	M	F	R	0829	F-MF-8X-0-DPA	0	602	2	8
	Control	0829 F MF	M	F	R	0829	F-MF-8X-14-DPA	14	562	1	8
	Control	0829 F MF	M	F	R	0829	F-MF-8X-14-DPA2	14	564	5	8
	Control	0829 F MF	M	F	R	0829	F-MF-8X-21-DPA	21	588	6	8
YL	Control	0903 A FH	F	H	L	0903	A FH - 0 DPA	0	1142	6	8
	Control	0903 A FH	F	H	L	0903	A FH - 14 DPA	14	1120	3	8
	Control	0903 A FH	F	H	L	0903	A FH - 21 DPA	21	1123	1	8
	Control	0903 A FH	F	H	L	0903	A FH - 21 DPA 2	21	1112	1	8
	Control	0903 A MH	M	H	L	0903	A MH - 0 DPA	0	906	1	8
	Control	0903 A MH	M	H	L	0903	A MH - 14 DPA	14	885	3	8
	Control	0903 A MH	M	H	L	0903	A MH - 21 DPA	21	904	4	8
	Control	0903 A MM	M	M	L	0903	A MM - 0 DPA	0	717	2	8
	Control	0903 A MM	M	M	L	0903	A MM - 14 DPA	14	711	8	8
	Control	0903 A MM	M	M	L	0903	A MM - 14 DPA 2	14	702	1	8
	Control	0903 B FH	F	H	L	0903	B FH - 0 DPA	0	1121	5	8
	Control	0903 B FH	F	H	L	0903	B FH - 14 DPA	14	1129	7	8
	Control	0903 B FH	F	H	L	0903	B FH - 21 DPA	21	1125	8	8
	Control	0903 B MH	M	H	R	0903	B MH - 0 DPA	0	781	12	8
	Control	0903 B MH	M	H	R	0903	B MH - 14 DPA	14	795	1	8
	Control	0903 B MM	M	M	L	0903	B MM - 0 DPA	0	951	3	8
	Control	0903 B MM	M	M	L	0903	B MM - 14 DPA	14	961	1	8
	Control	0903 B MM	M	M	L	0903	B MM - 21 DPA	21	964	1	8
	Control	0903 C FM	F	M	L	0903	C FM - 0 DPA	0	1253	1	8
	Control	0903 C FM	F	M	L	0903	C FM - 14 DPA	14	1225	13	8
	Control	0903 C MH	M	H	R	0903	C MH - 0 DPA	0	1176	4	8
	Control	0903 C MH	M	H	R	0903	C MH - 14 DPA	14	1152	13	8
	Control	0903 C MH	M	H	R	0903	C MH - 21 DPA	21	1174	1	8
	Control	0903 D FM	F	M	L	0903	D FM - 0 DPA	0	1201	8	8
	Control	0903 D FM	F	M	L	0903	D FM - 14 DPA	14	1215	12	8
	Control	0903 D FM	F	M	L	0903	D FM - 21 DPA X	21	1204	3	8
	Control	0903 D MH	M	H	R	0903	D MH - 0 DPA	0	1250		8
	Control	0903 D MH	M	H	R	0903	D MH - 14 DPA	14	1263	2	8
	Control	0903 D MH	M	H	R	0903	D MH - 21 DPA	21	1268	1	8
	Control	0903 E FF	F	F	R	0903	E FF - 0 DPA	0	433	5	8
	Control	0903 E FF	F	F	R	0903	E FF - 14 DPA	14	426	1	8
	Control	0903 E FH	F	H	R	0903	E FH - 0 DPA	0	1072	1	8
	Control	0903 E FH	F	H	R	0903	E FH - 14 DPA	14	1097	1	8
	Control	0903 E MH	M	H	R	0903	E MH - 0 DPA	0	1147	8	8
	Control	0903 E MH	M	H	R	0903	E MH - 14 DPA	14	1144	1	8
	Control	0903 E MH	M	H	R	0903	E MH - 21 DPA	21	1170	5	8
	Control	0903 F FF	F	F	L	0903	F FF - 0 DPA	0	450	6	8
	Control	0903 F FF	F	F	L	0903	F FF - 0 DPA 2	0	447	1	8
	Control	0903 F FF	F	F	L	0903	F FF - 14 DPA	14	447	14	8
	Control	0903 F FH	F	H	L	0903	F FH - 0 DPA	0	825	1	8
	Control	0903 F FH	F	H	L	0903	F FH - 21 DPA	21	815	1	8
	Control	0903 F MF	M	F	L	0903	F MF - 0 DPA	0	1014	3	8
	Control	0903 F MF	M	F	L	0903	F MF - 14 DPA	14	1030	1	8
	Control	0903 F MF	M	F	L	0903	F MF - 21 DPA	21	1011	1	8
	Control	0908 A FH	F	H	R	0908	A FH - 14 DPA	14	834	1	8
	Control	0908 A FH	F	H	R	0908	A FH - 21 DPA	21	833	1	8
	Control	0908 A MF	M	F	R	0908	A MF - 0 DPA	0	805	8	8
	Control	0908 A MF	M	F	R	0908	A MF - 21 DPA	21	796	5	8
	Control	0908 A MM	M	M	L	0908	A MM - 0 DPA	0	1049	6	8
	Control	0908 A MM	M	M	L	0908	A MM - 0 DPA 2	0	321	7	2.5
	Control	0908 A MM	M	M	L	0908	A MM - 14 DPA	14	1071	1	8
	Control	0908 A MM	M	M	L	0908	A MM - 14 DPA 2	14	1064	1	8
	Control	0908 A MM	M	M	L	0908	A MM - 21 DPA	21	1061	7	8
	Control	0908 B FF	F	F	R	0908	B FF - 0 DPA	0	1053	4	8
	Control	0908 B FF	F	F	R	0908	B FF - 14 DPA	14	1031	1	8
	Control	0908 B FM	F	M	R	0908	B FM - 0 DPA	0	989	1	8
	Control	0908 B FM	F	M	R	0908	B FM - 14 DPA	14	987	4	8
	Control	0908 B FM	F	M	R	0908	B FM - 21 DPA	21	1009	1	8
	Control	0908 B MH	M	H	R	0908	B MH - 0 DPA	0	1066	1	8
	Control	0908 B MH	M	H	R	0908	B MH - 14 DPA	14	1067	8	8
	Control	0908 B MH	M	H	R	0908	B MH - 21 DPA	21	1067	1	8
	Control	0908 C FH	F	H	R	0908	C FH - 0 DPA	0	1233	1	8
	Control	0908 C FH	F	H	R	0908	C FH - 14 DPA	14	1248	13	8
	Control	0908 C FH	F	H	R	0908	C FH - 21 DPA	21	1254	1	8
	Control	0908 C FM	F	M	L	0908	C FM - 0 DPA	0	1150	5	8
	Control	0908 C FM	F	M	L	0908	C FM - 0 DPA 2	0	1155	4	8
	Control	0908 C FM	F	M	L	0908	C FM - 14 DPA	14	1162	8	8
	Control	0908 C MH	M	H	R	0908	C MH - 0 DPA	0	794	6	8
	Control	0908 C MH	M	H	R	0908	C MH - 14 DPA	14	784	12	8
	Control	0908 C MH	M	H	R	0908	C MH - 14 DPA 2	14	796	14	8
	Control	0908 C MH	M	H	R	0908	C MH - 21 DPA	21	805	5	8
	Control	0908 D FF	F	F	L	0908	D FF - 0 DPA	0	632	1	8
	Control	0908 D FF	F	F	L	0908	D FF - 14 DPA	14	649	4	8
	Control	0908 D FF	F	F	L	0908	D FF - 21 DPA	21	636	10	8
	Control	0908 D FF	F	F	L	0908	D FF - 21 DPA 2	21	640	1	8
	Control	0908 D FM	F	M	R	0908	D FM - 0 DPA	0	756	5	8
	Control	0908 D FM	F	M	R	0908	D FM - 14 DPA	14	767	12	8
	Control	0908 D FM	F	M	R	0908	D FM - 21 DPA	21	773	1	8
	Control	0908 D MF	M	F	L	0908	D MF - 0 DPA	0	692	1	8
	Control	0908 D MF	M	F	L	0908	D MF - 14 DPA	14	698	6	8
	Control	0908 D MF	M	F	L	0908	D MF - 21 DPA	21	704	6	8
	Control	0908 E FM	F	M	R	0908	E FM - 0 DPA	0	1122	6	8
	Control	0908 E FM	F	M	R	0908	E FM - 14 DPA	14	1139	1	8
	Control	0908 E FM	F	M	R	0908	E FM - 21 DPA	21	1118	1	8
	Control	0908 E MF	M	F	R	0908	E MF - 0 DPA	0	759	5	8
	Control	0908 E MF	M	F	R	0908	E MF - 14 DPA	14	780	1	8
	Control	0908 E MF	M	F	R	0908	E MF - 21 DPA	21	761	2	8
	Control	0908 E MH	M	H	L	0908	E MH - 0 DPA	0	1083	1	8
	Control	0908 E MH	M	H	L	0908	E MH - 14 DPA	14	1096	13	8
	Control	0908 E MH	M	H	L	0908	E MH - 21 DPA	21	1106	1	8
	Control	0908 E MH	M	H	L	0908	E MH - 21 DPA 2	21	1112	9	8
	Control	0908 F MH	M	H	L	0908	F MH - 0 DPA	0	803	1	8
	Control	0908 F MH	M	H	L	0908	F MH - 14 DPA	14	804	1	8
	Control	0908 F MM	M	M	R	0908	F MM - 0 DPA	0	964	1	8
	Control	0908 F MM	M	M	R	0908	F MM - 14 DPA	14	954	9	8
	Control	0908 F MM	M	M	R	0908	F MM - 21 DPA 2	21	952	9	8
	Control	0908 F MF	M	F	L	0908	F MF - 0 DPA	0	841	3	8
	Control	0908 F MF	M	F	L	0908	F MF - 14 DPA	14	835	5	8
	Control	0908 F MF	M	F	L	0908	F MF - 21 DPA	21	841	6	8
IL - YL	Control	0730-MM-A	M	M	L	0730-2	MM-8x-A-0-DPA	0	950	5	8
	Control	0730-MM-A	M	M	L	0730-2	MM-8x-A-7-DPA	7	937	3	8
	Control	0730-MM-A	M	M	L	0730-2	MM-8x-A-14-DPA	14	949	11	8
	Control	0730-MM-A	M	M	L	0730-2	MM-8x-A-20-DPA	20	950	1	8
	Control	0730-MM-A	M	M	L	0730-2	MM-8x-A-28-DPA	28	951	5	8
	Control	0730-MF-A	M	F	R	0730-2	MF-8x-A-0-DPA	0	738	5	8
	Control	0730-MF-A	M	F	R	0730-2	MF-8x-A-14-DPA	14	744	5	8
	Control	0730-MF-A	M	F	R	0730-2	MF-8x-A-20-DPA2	20	736	1	8
	Control	0730-FM-A	F	M	L	0730-2	FM-8x-A-0-DPA	0	837	14	8
	Control	0730-FM-A	F	M	L	0730-2	FM-8x-A-7-DPA	7	832	6	8
	Control	0730-FM-A	F	M	L	0730-2	FM-8x-A-20-DPA	20	835	2	8
	Control	0730-FM-A	F	M	L	0730-2	FM-8x-A-28-DPA	28	840	5	8
	Control	0730-FH-A	F	H	L	0730-2	FH-8x-A-0-DPA	0	884	14	8
	Control	0730-FH-A	F	H	L	0730-2	FH-8x-A-7-DPA-1	7	917	16	8
	Control	0730-FH-A	F	H	L	0730-2	FH-8x-A-7-DPA-3	7	912	6	8
	Control	0730-FH-A	F	H	L	0730-2	FH-8x-A-14-DPA	14	927	3	8
	Control	0730-FH-A	F	H	L	0730-2	FH-8x-A-20-DPA	20	925	5	8
	Control	0730-FH-A	F	H	L	0730-2	FH-8x-A-28-DPA	28	918	3	8
	Control	0730-FF-B	F	F	R	0730-2	FF-8x-B-0-DPA	0	773	7	8
	Control	0730-FF-B	F	F	R	0730-2	FF-8x-B-7-DPA	7	772	1	8
	Control	0730-FF-B	F	F	R	0730-2	FF-8x-B-14-DPA	14	766	1	8
	Control	0730-FF-B	F	F	R	0730-2	FF-8x-B-20-DPA	20	765	1	8
	Control	0730-FF-B	F	F	R	0730-2	FF-8x-B-28-DPA	28	765	1	8
	Control	0730-FF-B	F	F	R	0730-2	FF-8x-B-28-DPA-2	28	780	4	8
	Control	0730-FH-B	F	H	R	0730-2	FH-8x-B-7-DPA	7	966	10	8
	Control	0730-FH-B	F	H	R	0730-2	FH-8x-B-14-DPA	14	969	14	8
	Control	0730-FH-B	F	H	R	0730-2	FH-8x-B-28-DPA	28	486	4	4
	Control	0730-FM-B	F	M	R	0730-2	FM-8x-B-0-DPA	0	1267	3	8
	Control	0730-FM-B	F	M	R	0730-2	FM-8x-B-7-DPA	7	1269	1	8
	Control	0730-FM-B	F	M	R	0730-2	FM-8x-B-20-DPA	20	1228	1	8
	Control	0730-FM-B	F	M	R	0730-2	FM-8x-B-28-DPA	28	1251	2	8
	Control	0730-FH-C	F	H	L	0730-2	FH-8x-C-0-DPA	0	1070	8	8
	Control	0730-FH-C	F	H	L	0730-2	FH-8x-C-7-DPA	7	1057	1	8
	Control	0730-FH-C	F	H	L	0730-2	FH-8x-C-14-DPA	14	1045	1	8
	Control	0730-FH-C	F	H	L	0730-2	FH-8x-C-20-DPA	20	1062	1	8
	Control	0730-FM-C	F	M	L	0730-2	FM-8x-C-7-DPA	7	900	8	8
	Control	0730-FM-C	F	M	L	0730-2	FM-8x-C-14-DPA	14	908	20	8
	Control	0730-FM-C	F	M	L	0730-2	FM-8x-C-20-DPA	20	914	9	8
	Control	0730-FM-C	F	M	L	0730-2	FM-8x-C-28-DPA	28	907	2	8
	Control	0730-MH-C	M	H	R	0730-2	MH-8x-C-0-DPA	0	926	11	8
	Control	0730-MH-C	M	H	R	0730-2	MH-8x-C-7-DPA	7	938	1	8
	Control	0730-MM-C	M	M	L	0730-2	MM-8x-C-0-DPA	0	1048	8	8
	Control	0730-MM-C	M	M	L	0730-2	MM-8x-C-7-DPA	7	1043	5	8
	Control	0730-MM-C	M	M	L	0730-2	MM-8x-C-20-DPA	20	1026	4	8
	Control	0730-MM-C	M	M	L	0730-2	MM-8x-C-20-DPA2	20	1017	3	8
	Control	0730-MM-C	M	M	L	0730-2	MM-8x-C-28-DPA	28	1042	1	8
	Control	0730-FF-D	F	F	R	0730-2	FF-8x-D-0-DPA	0	706	9	8
	Control	0730-FF-D	F	F	R	0730-2	FF-8x-D-7-DPA	7	699	20	8
	Control	0730-FH-D	F	H	L	0730-2	FH-8x-D-7-DPA	7	1190	11	8
	Control	0730-FH-D	F	H	L	0730-2	FH-8x-D-14-DPA	14	1183	2	8
	Control	0730-FH-D	F	H	L	0730-2	FH-8x-D-20-DPA	20	1203	6	8
	Control	0730-FM-D	F	M	L	0730-2	FM-8x-D-0-DPA	0	1023	17	8
	Control	0730-FM-D	F	M	L	0730-2	FM-8x-D-7-DPA	7	1046	1	8
	Control	0730-FM-D	F	M	L	0730-2	FM-8x-D-20-DPA2	20	1020	1	8
	Control	0730-FM-D	F	M	L	0730-2	FM-8x-D-28-DPA	28	1034	8	8
AAS	LGI	6fhl	F	H	L	AAS	6-FHL-2x-AfterCut-Image Export-23_t0c0x0-3840y0-2160	0	234	1	2
	LGI	6fhl	F	H	L	AAS	6-FHL-2x8x-Day22-Image Export-22_t0c0x0-3840y0-2160	22	283	1	2
	LGI	6mhr	M	H	R	AAS	6-MHR-2x-AfterCut-Image Export-30_t32c0x0-3840y0-2160	0	220	1	2
	LGI	6mhr	M	H	R	AAS	6-MHR-2x8x-Day22-Image Export-29_t0c0x0-3840y0-2160	22	210	1	2
	LGI	8mhr	M	H	R	AAS	8-mhr-2x-aftercut-Image Export-06_t0c0x0-3840y0-2160	0	159	1	2
	LGI	8mhr	M	H	R	AAS	8-MHR-2x8x-Day21-Image Export-05_t0c0x0-3840y0-2160	21	172	1	2
	LGI	12mhr	M	H	R	AAS	12-mhr-2x-aftercut-12-mhr-Image Export-02_t33c0x0-3840y0-2160	0	204	1	2
	LGI	12mhr	M	H	R	AAS	12-MHR-2x8x-Day21-Image Export-13_t39c0x0-3840y0-2160	21	250	1	2
	LGI	13fmr	F	M	R	AAS	13-fmr-2x-aftercut-13-fmr-Image Export-05_t0c0x0-3840y0-2160	0	296	1	2
	LGI	13fmr	F	M	R	AAS	13-FMR-2x8x-Day21-Image Export-16_t38c0x0-3840y0-2160	21	288	1	2
	LGI	14fmr	F	M	R	AAS	14-fmr-2x-aftercut-14-fmr-Image Export-07_t0c0x0-3840y0-2160	0	216	1	2
	LGI	14fmr	F	M	R	AAS	14-FMR-2x8x-Day21-Image Export-18_t46c0x0-3840y0-2160	21	237	1	2
	LGI	15ffr	F	F	R	AAS	15-ffr-2x-aftercut-15-ffr-Image Export-10_t0c0x0-3840y0-2160	0	248	1	2
	LGI	15ffr	F	F	R	AAS	15-FFR-2x8x-Day21-Image Export-21_t34c0x0-3840y0-2160	21	263	1	2
	LGI	17mhr	M	H	R	AAS	17-mhr-2x-aftercut-17-mhr-Image Export-05_t25c0x0-3840y0-2160	0	239	1	2
	LGI	17mhr	M	H	R	AAS	17-MHR-2x8x-Day20-Image Export-12_t59c0x0-3840y0-2160	20	232	1	2
	LGI	17mmr	M	M	R	AAS	17-mmr-2x-aftercut-17-mmr-Image Export-06_t30c0x0-3840y0-2160	0	170	1	2
	LGI	17mmr	M	M	R	AAS	17-MMR-2x8x-Day20-Image Export-13_t39c0x0-3840y0-2160	20	291	1	2

## Sheet: SegmentReformed
ExperimenterID	Treatment	FlyID	Sex	CutLeg	SideCut	ExperimentID	FileName__tiff_	DPA		Legend
										Treatment: Control or LGI (leucine/glutamine/insulin) as described in the main text
LG-YL	LGI	0630 A MM	M	M	L	0630	A MM - 0 DPA 3	0		Sex: F = female, M = male
LG-YL	LGI	0630 A MM	M	M	L	0630	A MM 8X - 0 DPA	0		CutLeg: H = hindlimb, M = midlimb, F = forelimb
LG-YL	LGI	0630 A MM	M	M	L	0630	A MM - 16 DPA	16		SideCut: L = left, R = right
LG-YL	LGI	0630 A MM	M	M	L	0630	A MM - 28 DPA	28
LG-YL	LGI	0630 A MM	M	M	L	0630	A MM - 28 DPA 2	28		ExperimentID and FileName__tiff_:
LG-YL	LGI	0630 A MM	M	M	L	0630	A MM - 28 DPA 3	28			Combine this information to find where the file is located in CaltechDATA
											E.g., The file A FH - 0 DPA can be found under the folder 0619
LG-YL	LGI	0709 B FF	F	F	R	0709	B FF - 0 DPA 2	0
LG-YL	LGI	0709 B FF	F	F	R	0709	B FF - 0 DPA 3	0		DPA = days post amputation
LG-YL	LGI	0709 B FF	F	F	R	0709	B FF - 18 DPA	18
LG-YL	LGI	0709 B FF	F	F	R	0709	B FF - 18 DPA 2	18
LG-YL	LGI	0709 B FF	F	F	R	0709	B FF - 18 DPA X	18
LG-YL	LGI	0709 B FF	F	F	R	0709	B FF - 18 DPA X 2	18
LG-YL	LGI	0709 B FF	F	F	R	0709	B FF - 30 DPA	30
LG-YL	LGI	0709 B FF	F	F	R	0709	B FF - 30 DPA X	30
LG-YL	LGI	0709 B FF	F	F	R	0709	B FF - 30 DPA X 2	30
LG	LGI	0626 D FM	F	M	R	0626	D FM - 0 DPA	0
LG	LGI	0626 D FM	F	M	R	0626	D FM - 9 DPA	9
LG	LGI	0626 D FM	F	M	R	0626	D FM - 18 DPA	18
LG	LGI	0626 D FM	F	M	R	0626	D FM - 26 DPA	26
LG	LGI	0626 D FM	F	M	R	0626	D FM - 30 DPA-1	30
LG	LGI	0626 D FM	F	M	R	0626	D FM - 30 DPA X	30
ZC	LGI	Gamma-MBL	M	H	L	ZC	Gamma-MBL-aftercut	0
ZC	LGI	Gamma-MBL	M	H	L	ZC	Gamma-MBL-2WA	14
LG	LGI	0626 A MM	M	M	L	0626	A MM - 0 DPA	0
LG	LGI	0626 A MM	M	M	L	0626	A MM - 9 DPA	9
LG	LGI	0626 A MM	M	M	L	0626	A MM - 18 DPA 2	18
LG	LGI	0626 A MM	M	M	L	0626	A MM - 25 DPA 2	25
