# Supplementary material for: A conserved strategy for inducing appendage regeneration in moon jellyfish, Drosophila, and mice
Source: eLife. 2021 Dec 7;10:e65092. doi: 10.7554/eLife.65092 (PMC8782573; doi:10.7554/eLife.65092)
Supplement: Figure 6—source data 1. — The spreadsheet documents the raw image filename, amputation type, and phenotype scoring. [file elife-65092-fig6-data1.xlsx]

## Sheet: Sheet1
Condition Control, treatment	Digit ID	Amputation type P2, P3	Phenotype 1, 2, 3, 4		ReadMe
Control	C1-L2	P2	1		This spreadsheet coressponds to the mouse digit bone staining data presented in Figure 6 and the related figure supplements
Control	C1-L4	P3	2		Each row corresponds to an image file available in CaltechDATA, https://doi.org/10.22002/D1.1790
Control	C1-LR2	P2	1		Amputation type: P2 amputation cuts across the mid-phalangeal bone; P3 amputation is a proximal cut across the distal phalange, including cuts that remove the whole P3.
Control	C1-LR4	P2	1
Control	C1-N2	P2	1		Phenotype key (illustrated in Figure 6--figure supplement 1):
Control	C1-N4	P3	1		1 - Digit stumps show hystolysis
Control	C1-R2	P3	2		2 - Digit stump showno obvious change. The removed portion and stump can be pieced together to reconstruct thedigit.
Control	C1-R4	P2	1		3 - Digit stump shows recovery of some morphological characters (see Figure 6--figure supplement 2)
Control	C1-RR2	P3	1		4 - Digit stumps show excess, ectopic bone mass
Control	C1-RR4	P2	2		Table summarizing this data are presented in Figure 6--figure supplement 1
Control	C2-L2	P3	1		Experimental details are described in Methods
Control	C2-L4	P2	1
Control	C2-LR2	P2	1
Control	C2-LR4	P2	1
Control	C2-N2	P3	1
Control	C2-N4	P3	2
Control	C2-R2	P2	1
Control	C2-R4	P3	2
Control	C2-RR2	P2	1
Control	C2-RR4	P2	1
Control	C3-L4	P3	2
Control	C3-LR2	P3	2
Control	C3-LR4	P3	1
Control	C3-N4	P3	1
Control	C3-R2	P3	2
Control	C3-R4	P3	2
Control	C4-L2	P3	1
Control	C4-L4	P2	1
Control	C4-LR4	P3	2
Control	C4-N2	P3	1
Control	C4-N4	P3	2
Control	C4-R4	P3	1
Control	C4-RR2	P3	1
Control	C4-RR2	P3	2
Treatment	LG1-L2	P2	4
Treatment	LG1-L4	P2	1
Treatment	LG1-LR2	P3	2
Treatment	LG1-LR4	P3	2
Treatment	LG1-N2	P2	3
Treatment	LG1-N4	P2	1
Treatment	LG1-R2	P3	1
Treatment	LG1-R4	P2	1
Treatment	LG2-L2	P3	2
Treatment	LG2-L4	P3	2
Treatment	LG2-LR2	P2	1
Treatment	LG2-LR4	P3	1
Treatment	LG2-N2	P3	1
Treatment	LG2-N4	P2	4
Treatment	LG2-R2	P2	3
Treatment	LG2-R4	P2	3
Treatment	LG2-RR2	P2	1
Treatment	LG2-RR4	P3	2
Treatment	LG4-L2	P2	4
Treatment	LG4-L4	P3	3
Treatment	LG4-LR2	P3	2
Treatment	LG4-LR4	P3	2
Treatment	LG4-N2	P3	2
Treatment	LG4-N4	P3	2
Treatment	LG4-R2	P2	1
Treatment	LG4-R4	P2	1
Treatment	LG4-RR2	P2	1
Treatment	LG4-RR4	P2	1
Treatment	LG5-L2	P2	1
Treatment	LG5-L4	P2	1
Treatment	LG5-LR2	P2	1
Treatment	LG5-LR4	P2	1
Treatment	LG5-N2	P2	1
Treatment	LG5-N4	P2	1
Treatment	LG5-R2	P2	3
Treatment	LG5-R4	P2	1
Treatment	LG5-RR2	P2	1
Treatment	LG5-RR4	P2	1
Treatment	LG6-L2	P2	1
Treatment	LG6-L4	P2	1
Treatment	LG6-LR2	P2	1
Treatment	LG6-LR4	P2	1
Treatment	LG6-N2	P2	2
Treatment	LG6-N4	P2	1
Treatment	LG6-R2	P2	1
Treatment	LG6-R4	P2	3
Treatment	LG6-RR2	P2	1
Treatment	LG6-RR4	P2	1
